# Supplementary material
Source: PubMed Central journal article supplement (PMC6714024)
Supplement: jamacardiol-4-969-s001.pdf [file jamacardiol-4-969-s001.pdf]

## Supplementary Online Content

Kohli-Lynch CN, Bellows BK, Thanassoulis G, et al. Cost-effectiveness of low-density lipoprotein cholesterol level-guided statin treatment in patients with borderline cardiovascular risk. *JAMA Cardiol*. Published online August 28, 2019. doi:10.1001/jamacardio.2019.2851

**eMethods.** Background, Model Structure, Model Inputs, and CVD Policy Model Microsimulation Version Discrimination and Recalibration

**eTable 1.** Logistic Risk Functions Determining Incident Event Probability in the CVD Policy Model Microsimulation Version

**eTable 2.** Difference Between NHANES Observed and NHLBI Pooled Cohort Imputed CVD Risk Factors

**eTable 3.** Probabilities for Nonincident CHD and Stroke Events in the CVD Policy Model Microsimulation Version

**eTable 4.** Chronic and Acute Utilities Used in CVD Policy Model Microsimulation Version

**eTable 5.** Health State and Acute Event Costs Used in CVD Policy Model Microsimulation Version

**eTable 6.** Comparison of CVD Policy Model Microsimulation Version and O'Sullivan et al's Health Care Costs

**eTable 7.** Statin-Intensity Classifications

**eTable 8.** Characteristics of the Simulation Cohort at Ages 40, 50, and 60 Years Without Statin Treatment

**eTable 9.** Number of ASCVD Events Prevented Over 10 Years for Risk- and Cholesterol-Based Statin Treatment Strategies

**eTable 10.** Scenario Analyses Showing the Costs, QALYs, and ICERs When Changing Model Assumptions

**eTable 11.** Scenario Analyses Showing the ICERs When Changing Model Assumptions

**eTable 12.** Cost-Effectiveness of Statins for Borderline Risk Individuals With Chronic Kidney Disease

**eTable 13.** Consolidated Health Economic Evaluation Reporting Standards (CHEERS) Statement

**eTable 14.** Cross-Validation of the CVD Policy Model Microsimulation Version vs Pandya et al's ASCVD Risk Threshold Statin Cost-Effectiveness Analysis

**eFigure 1.** CVD Policy Model Microsimulation Version Structure, Within-Cycle Events

**eFigure 2.** Validation of the CVD Policy Model Microsimulation Version

**eFigure 3.** Untreated LDL Cholesterol Lifetime Trajectory

**eFigure 4.** Cost-Effectiveness Plane for Base Case Analysis

**eFigure 5.** One-Way Sensitivity Analysis Tornado Diagram

**eFigure 6.** One-Way Sensitivity Analysis of Statin-Related Adverse Event Disutility on Discounted QALY Gains for Standard Care vs Standard Care Plus Treat LDL 160-189 mg/dL

**eFigure 7.** Cost-Effectiveness Acceptability Curve

**eFigure 8.** Incremental Cost-Effectiveness Scatter Plot

**eReferences.**

This supplementary material has been provided by the authors to give readers additional information about their work.

## eMethods

### Background, Model Structure, Model Inputs, and CVD Policy Model Microsimulation Version Discrimination and Recalibration

#### **Background: microsimulation version of the Cardiovascular Disease Policy Model**

Motivated by the need to choose between competing interventions for coronary heart disease, Weinstein and colleagues published the Coronary Heart Disease Policy Model in 1987.<sup>1</sup> This decision-analytic cohort simulation model was developed to forecast coronary heart disease incidence, prevalence, mortality, and cost in the US population. The form of the model is “compartmental”, and groups of individuals who share similar average characteristics (age, sex, risk factor exposure levels, and cardiovascular health states) are simulated together; interventions to alter risk factor exposures or treat disease states are also applied at the level of the group. Developed to study epidemiology and policy related to coronary heart disease alone, the original model now predicts the health and cost outcomes of interventions that affect both coronary heart disease and stroke incidence in the U.S. population. The model is now named the Cardiovascular Disease (CVD) Policy Model. Inputs have also been updated regularly, as has the Fortran software platform on which the model runs.

The model has been redeveloped to perform simulations of individual life time cardiovascular health histories (microsimulation). In contrast to the traditional CVD Policy Model, the microsimulation version both simulates individual risk factor exposures and cardiovascular health histories, and simulated preventive interventions are applied at the individual level. This new iteration of the model was developed using TreeAge software (TreeAge Inc, Williamstown, MA, U.S.A.) using data inputs from the traditional CVD Policy Model and was validated using the traditional model. Hereafter in this document, this new model version will be referred to as the CVD Policy Model microsimulation version.

The CVD Policy Model microsimulation version was developed for three specific purposes:

1. Quantifying the effect of life-course, cumulative exposures to CVD risk factors, and estimating health and cost outcomes attributable to interventions that reduce such exposures.
2. Use in clinical practice as a tool which helps physicians and their patients understand lifetime risk and the benefits and risks of intervening of exposures at different stages of the life-course in a competing risk framework.
3. Flexible “switch out” of simulation cohorts and their characteristics, allowing for long-term simulations of lifetime benefits and risks of hypothetical interventions on observational cohorts (e.g., the MESA study cohort), or extension of short-term clinical trials (e.g., SPRINT or BARBER trials).

#### **Model Structure**

The CVD Policy Model microsimulation version simulates coronary heart disease (CHD) and stroke incidence and prevalence in the US population aged 20 and older. The model’s primary outputs are CVD event rates, life years, quality-adjusted life years (QALYs), and direct health care costs. The default perspective adopted in the CVD Policy Model microsimulation version is that of the U.S. health care sector. Analyses therefore account for all health gains in the population and all direct and indirect medical costs borne by U.S. payers (e.g., patients, third-party payers).

**Figure 1** in the manuscript shows the model structure and CVD-related state transitions that may occur annually. Each year, individuals can transition one time between the following five health states: (1) No CVD, (2) Chronic CHD, (3) Chronic Stroke, (4) Chronic CHD + Stroke, and (5) Death. Possible transitions are illustrated by the arrows. **eFigure 1** shows the clinical events that may occur within each model cycle that determine the health state transitions. Individuals first are at risk for having an acute CVD event or non-CVD death. If individuals do not have an acute CVD event and do not experience a non-CVD death, they remain in their current health state that cycle. If individuals have either an acute CHD event or an acute stroke, that event may be fatal or non-fatal. If non-fatal, they

may have a second event of the same type. If they do not have a recurrent event, they may also have the other cardiovascular disease event type.

A large input dataset containing time-varying risk factor information for each individual is used to run the model. For each “run” of the model, a cohort of patients is randomly selected with replacement from the input dataset. Each profile is used in the model to determine the probability that individuals experience CVD events and progress through the model’s health states over their remaining lifetime. Each health state has an attributed health-related quality of life (i.e., utility – an overall assessment of well-being on a scale from 0 [death] to 1 [perfect health]) and cost. Based on the individual’s specific ‘history’ through the model, cost and health outcomes are estimated. This information allows cost-effectiveness and other decision-analytic metrics to be calculated for the population.

## Model Inputs

### *Probability of first-ever, incident CVD*

The annual probabilities of first-ever CVD event (i.e., acute myocardial infarction, unstable or stable angina pectoris, cardiac arrest, or acute stroke) and the competing probability of non-CVD death are estimated with risk functions derived from analysis of the NHLBI Pooled Cohorts Project at Columbia University.<sup>2</sup> The Pooled Cohorts Project contains data from six U.S. National Institutes of Health (NIH)-funded observational cohort studies: Atherosclerotic Risk in Communities (ARIC) Study, Cardiovascular Risk Development in young Adults (CARDIA) Study, Cardiovascular Health Study (CHS), Framingham Heart Study Offspring Cohort (FHS-O), Health, Aging, and Body Composition (Health ABC) Study, Multi-Ethnic Study of Atherosclerosis (MESA) Study.<sup>3-8</sup> All studies regularly collected information on participants CVD risk factors, and prospectively detailed incident CVD events. Each of these studies obtained informed consent from study participants. Columbia University entered into data use agreements with each cohort’s coordinating center and pooled cohorts analysis plans were approved by the cohort study investigators.

Probabilities of first CVD event and probability of non-CVD death are operationalized in a logistic risk function that takes the following form:

$$rate_{k,i} = \frac{\exp(\alpha + x\beta)}{1 + \exp(\alpha + x\beta)}$$

In this equation,  $rate_{k,i}$  denotes the annual probability of disease-free individual  $i$  experiencing primary CVD event  $k$ . The value  $\alpha$  represents the underlying event rate for  $k$  in the Pooled Cohorts population (or more specifically the intercept in the null model). The term  $x$  is a vector of CVD risk factors. The risk factors included in the base model are: continuous age, systolic blood pressure (SBP), low-density lipoprotein cholesterol (LDL-C) and high-density lipoprotein cholesterol (HDL-C), tobacco smoking (cigarettes per day), body mass index (BMI), and categorical diabetes status (fasting glucose  $\geq 126$  mg/dl [7.0 mmol/L] or taking anti-diabetes medications). The term  $\beta$  is a vector of coefficients where each coefficient represents the additive increase in log odds of event  $k$  associated with a risk factor in  $x$ . Therefore, an individual’s annual incident CVD event risk is increased or decreased compared to the population average in accordance with their risk factor profile. Green and Symons have shown that the regression coefficients of the logistic model approximate to those of a proportional hazards model which has a constant underlying hazard rate.<sup>9</sup>

The pooled cohorts logistic risk equations are presented in **eTable 1**. The overall population incidence was re-calibrated to replicate incidence output from the traditional CVD Policy Model and contemporary cause-specific CVD and non-CVD death rates.

### *Simulation Cohort*

The model is populated by a cohort of individuals from the 1999-2014 National Health and Nutrition Examination Survey (NHANES) that are matched to participants in the NHLBI Pooled Cohort Project at Columbia University.<sup>10</sup> NHANES is a large-scale, cross-sectional nationwide survey of health and nutritional status in which individuals are

selected for inclusion using a complex, multistage probability sampling design. The probability sampling design allowed for oversampling of low-response demographics. The weighted NHANES-based estimates reflect the civilian, non-institutionalized U.S. population. We used survey, examination, and laboratory data for key CVD risk factors from NHANES respondents aged 20-85 years.

We used the following inclusion criteria to select participants from NHANES and the NHLBI Pooled Cohort Project. For both NHANES and NHLBI Pooled Cohort, we only included individuals who self-reported to be free from CVD (i.e., no history of myocardial infarction, angina, heart failure, or stroke) at the time of NHANES examination or at the baseline visit for the CU-NHLBI Pooled Cohort. For NHANES, we further selected individuals with complete data for the following CVD risk factors: age, SBP, diastolic blood pressure (DBP), current antihypertensive medication use (yes/no), LDL-C, HDL-C, total cholesterol, current lipid-lowering medication use (yes/no), tobacco smoking (cigarettes per day), BMI, serum glucose, diabetes status (yes/no) and serum creatinine. Similarly, from the Pooled Cohort, we further selected individuals with at least one non-missing value for each of the above-mentioned CVD risk factors during any study visit.

#### *Fitting risk factor exposure trajectories from age 20 years until age 89 years or death*

We imputed lifetime trajectories (each year from age 18 to 99 years) for each of the CVD risk factors described above in individuals in the NHLBI Pooled Cohort Project. The details of this approach are described elsewhere.<sup>11,12</sup> Briefly, we leveraged the risk factor patterns observed in the younger cohorts to impute unobserved early adult exposures in the older cohorts and vice versa. We used a series of linear mixed models to estimate latent trajectories underlying the observed values for each participant, and imputed risk factor levels annually from age 18 years until age 99 or death for each participant. To account for estimation error in imputed risk factors trajectories, we used multiple imputation techniques to obtain 15 imputed datasets for the Pooled Cohort.

For modeling lipid-lowering medications, we also calculated the untreated LDL-C, HDL-C, and total cholesterol by subtracting the beta-coefficient for lipid-lowering medication from the linear mixed model used for multiple imputation (i.e., we assumed that the beta-coefficient represented the potential reduction in cholesterol associated with use of lipid-lowering medication use) (**eFigure 3**). For example, an individual who started lipid-lowering medication at age 60, with an imputed LDL-C of 125 mg/dL at age 60 and a beta-coefficient of -0.26 for lipid-lowering medication use, would have an estimated untreated LDL-C:

$$\text{Untreated LDL} = e^{LN(125) - (-0.26)} = 162 \text{ mg/dL}$$

Note: cholesterol levels were log-transformed in the imputation models.

#### *Matching NHANES and NHLBI Pooled Cohort Project participants*

After applying the inclusion criteria, 14,917 NHANES participants were available to match to 35,544 unique individuals in the NHLBI Pooled Cohort Project. Since we created 15 imputed datasets for each Pooled Cohort participant, this resulted in 533,160 participant trajectories available for matching. We randomly matched NHANES participants 1:1 to Pooled Cohort participants with replacement. We matched on CVD risk factors using the values observed at the NHANES examination visit and the imputed values for the Pooled Cohort. We required exact matches for baseline age, race (white, black, or other), sex, diabetes diagnosis, current smoking status, current antihypertensive medication use, and current lipid-lowering medication use. Additionally, based on clinical experience, we required matches to be within defined thresholds for the following continuous CVD risk factors. We required the NHLBI Pooled Cohort imputed SBP and DBP to be within 5 mm Hg of NHANES observed values, LDL-C to be within 10 mg/dL, and 10-year atherosclerotic CVD risk to be within 2.5%.

We matched 12,096 NHANES participants to CU-NHLBI Pooled Cohort participants. Overall, the mean (standard deviation) baseline age of the matched cohort was 46.1 (17.3) years and 54.0% were female. At the baseline age, mean SBP was 120.0 (15.2), mm Hg, DBP was 70.5 (9.4) mm Hg, LDL-C was 117.2 (31.3) mg/dL, and 10-year atherosclerotic CVD risk was 7.0% (11.5%). Participants were well-matched on these CVD risk factors (**eTable 2**).

### *Probability of survival to 30 days after an acute CVD event*

The model incorporates the risk of 30-day case fatality in individuals experiencing coronary heart disease and stroke events, stratified by age and sex (**eTable 3**). The 30-day case fatality rate for coronary heart disease events differs between primary and recurrent coronary heart disease events. For stroke, 30-day case fatality rates were assumed to be equal for primary and secondary events.

### *Probability of recurrent CVD events in the population living with chronic CVD*

The risk of recurrent CVD events and chronic CVD health state transitions among the population living with chronic CVD states are based on natural history studies of community-dwelling patients living with chronic CVD or on hospital-based CVD case registries (**eTable 3**). These secondary events include: recurrent CHD event within a year of a prior occurrence, recurrent CHD event after a year of a prior occurrence, stroke after CHD, CHD after stroke within 10 years, and CHD preceding stroke after 10 years.

### *Treatment effects*

The health benefit associated with treatment may be employed in two key ways within the structure of the model. Firstly, a primary intervention which changes the value of a patient's risk factor may be modelled directly (e.g. 15 mm Hg reduction in SBP, 30% reduction in LDL-C). These effects will then affect the individual's probability of developing CVD within the model via the risk equations which determine probability of incident event. An individual's risk of experiencing an event within the model may also be modulated by a relative risk. Modulating probability of event with a unitary relative risk across all patients implicitly assumes that the relative risk associated with treatment is consistent across patient subpopulations. Cost of treatment and patient monitoring can be added to patients receiving treatment in the model, as can screening costs.

### *Health-related quality of life according to health state*

Health benefits are accumulated through health-related quality of life assigned to health states. Details of the value and source of the health-related quality of life inputs are included in **eTable 4**. QALYs are used to reflect health-related quality of life in the model. This measure reflects both quality and longevity of health, where 1.0 represents perfect health, and QALYs less than 1.0 represent health loss due to illness or imperfect health. These are a useful metric for assessment of the health effects of preventive interventions for CVD as CVD-related events can reduce both quality and longevity of life.

Health-related quality of life inputs were derived from a combination of data regarding CVD event rates in the US<sup>13,14</sup> and utility weights derived from international analysis.<sup>15</sup> Each health state has attributed an annual QALY penalty. Additionally, all acute events in the model (e.g., hospitalizations, fatalities) have an associated acute (30-day) QALY penalty. All outcome values are age-differentiated to account for age-based heterogeneity in costs and health-related quality of life. While receiving a treatment, individuals may experience treatment-related disutility. Such disutility is applied in the model by subtracting an annual treatment-related QALY decrement from an individual's total QALYs in each cycle of the model that they receive treatment.

### *CVD and background direct medical costs*

Costs for stroke hospitalization, CHD hospitalization, and acute stroke rehabilitation, which account for hospital bed, provider, medication, and procedural costs, were estimated using Californian hospital data, deflated using cost-to-charge ratios and the ratio of US national-to-Californian average costs.<sup>16,17</sup> Outpatient costs incurred by patients with chronic CVD were estimated with pooled 1998-2008 Medical Expenditure Panel Survey (MEPS) data.<sup>18</sup> Every

simulated individual accrues annual age-specific “background” cost, or “non-CVD” cost (i.e., non-CHD and non-stroke cost). Background costs were also estimated from MEPS. All costs were indexed to the year 2019 using the medical component of the US Consumer Price Index.<sup>19</sup> Details of the value and source of the model’s cost inputs are included in **eTable 5**.

#### *Alternative sources of cost data*

Costs and utilization of health services can vary across the US. Hence, the sources employed to assign health state and acute event costs in the model may lead to biased results. It is therefore useful to compare costs employed in the model with other sources of CVD-related health costs. In 2011, O’Sullivan et al. analyzed administrative claims data from around 21.5 million commercial and Medicare Advantage members from across the US to estimate costs associated with a range of CVD-related events.<sup>21</sup> These costs have been used to define health state and acute health costs in a previously-published cost-effectiveness analyses of preventive interventions for CVD.<sup>22</sup> The costs employed in the CVD Policy Model microsimulation version and O’Sullivan et al.’s estimates are presented in **eTable 6**.

Chronic, acute, and fatal health costs were estimated according to regression equations provided in the supplemental appendix of O’Sullivan et al.’s analysis of administrative claims data. These were converted into a form which would enable comparison with the CVD Policy Model microsimulation version. Age-based non-fatal MI and angina costs from O’Sullivan et al. were weighted and combined into a unitary CHD cost. Similarly, ischemic and hemorrhagic stroke were weighted and combined to replicate the CVD Policy Model microsimulation version’s stroke state. Costs were also age-stratified or averaged across age-groups where appropriate.

For chronic and acute CHD events, the policy model’s inputs were similar to those derived from the regression equations. However, the regression-based CHD costs tended to drop in later life, while the CVD Policy Model microsimulation version costs generally increase with age. O’Sullivan et al. do not detail the age-groups in which their regression models are valid. It is possible that their model should not be used to predict costs in elderly individuals.

When compared with the regression-based costs, the CVD Policy Model microsimulation version inputs generally assumes higher costs for CHD mortality, chronic stroke, and acute stroke events. For chronic stroke in particular, regression-based costs appear improbable. For example, in years following a stroke event, the aggregated regression-based cost for chronic stroke is lower for cases than controls. If the CVD Policy Model microsimulation version is systematically over-predicting CVD-related costs, it is possible that the model overstates the cost-effectiveness of interventions which reduce incidence of CHD and stroke. This must be weighed against the fact that the model assigns a lower cost to stroke mortality than O’Sullivan et al.’s equations

#### *Annual statin medication costs*

We used the 2015 Prescribed Medicines File from the Medical Expenditure Panel Survey (MEPS)<sup>20</sup> available from the Agency for Healthcare Research and Quality (AHRQ) to estimate the cost of moderate- and high-intensity statins. When weighted appropriately, cost estimates from MEPS are considered nationally representative and include all US payers (e.g., Medicare, Medicaid, private, Veterans Affairs, patients). We identified moderate- and high-intensity statins, regardless of brand or generic products, by the drug name and dose combinations shown in **eTable 7**. We excluded records that did not include the prescription name, strength, or quantity dispensed. We also excluded non-tablet formulations. Due to a small number of records with “partial” tablets dispensed (e.g., 2.5 entered as the quantity), we only included records with at least 7 tablets dispensed.

We assumed once per day dosing and calculated the annual cost for each statin fill as the (cost to all payers/quantity dispensed)\*365 days. As generic statin prices have decreased since 2015 and rosuvastatin is now generically available, we attempted to account for these temporal changes in cost by: (1) only including the lowest cost statin fill for each individual when estimating the survey-weighted costs and (2) using the median rather than the mean survey-weighted cost. We then determined the annual survey-weighted cost separately for moderate- and high-intensity statins and used the survey-weighted standard error to represent uncertainty in these estimates. Upper and lower bounds for statin costs used in sensitivity analysis were derived from the 25th and 75th percentile of statin costs in MEPS, respectively.

### **CVD Policy Model Microsimulation Version Discrimination and Recalibration**

The traditional CVD Policy Model is regularly validated against US national estimates of stroke mortality, CHD mortality, and all-cause mortality. These model outcomes were within 1% of estimates from 2010 US national vital statistics and the US National Hospital Discharge Survey (NHIS).

**eFigure 2** shows the validation of the CVD Policy Model microsimulation version by comparing its incidence rates with the traditional CVD Policy Model, cumulative mortality rates with reports from the Centers for Disease Control and Prevention's Wide-ranging ONline Data for Epidemiologic Research (WONDER) data,<sup>23</sup> and overall survival with US lifetables.

**eTable 1. Logistic Risk Functions Determining Incident Event Probability in the CVD Policy Model Microsimulation Version**

| Parameter                            | Description              | Hazard Ratio (95% CI) | Beta Value (95% CI)           | Source                          |
|--------------------------------------|--------------------------|-----------------------|-------------------------------|---------------------------------|
| Risk function: Incident CHD event    |                          |                       |                               |                                 |
| Age                                  | Years <sup>a</sup>       | 1.107 (1.090, 1.125)  | 0.10156 (0.08578, 0.11734)    | CU-NHLBI Pooled Cohorts Dataset |
| African American                     | Binary                   | 0.885 (0.826, 0.949)  | -0.12189 (-0.19158, -0.05220) |                                 |
| BMI                                  | kg/m <sup>2</sup>        | 1.006 (1.000, 1.012)  | 0.00597 (0.00046, 0.01147)    |                                 |
| Former smoker                        | Binary                   | 1.204 (1.134, 1.278)  | 0.18574 (0.12603, 0.24545)    |                                 |
| Current smoker                       | Binary                   | 1.683 (1.496, 1.893)  | 0.52051 (0.40291, 0.63811)    |                                 |
| Cigarettes per day                   | -                        | 1.006 (1.001, 1.011)  | 0.00604 (0.00126, 0.01083)    |                                 |
| Systolic blood pressure              | mmHg                     | 1.013 (1.012, 1.014)  | 0.01289 (0.01149, 0.01429)    |                                 |
| Diabetes                             | Binary                   | 1.916 (1.789, 2.052)  | 0.65028 (0.58172, 0.71884)    |                                 |
| HDL-C                                | mg/dL                    | 0.985 (0.983, 0.988)  | -0.01488 (-0.01727, -0.01250) |                                 |
| LDL-C                                | mg/dL                    | 1.005 (1.005, 1.006)  | 0.00543 (0.00466, 0.00619)    |                                 |
| eGFR                                 | mL/min/1.73 <sup>2</sup> | 0.993 (0.992, 0.995)  | -0.00676 (-0.00849, -0.00504) |                                 |
| Age x current smoker                 | -                        | 0.987 (0.982, 0.991)  | -0.01349 (-0.01841, -0.00856) |                                 |
| Age x systolic blood pressure        | -                        | 1.000 (1.000, 1.000)  | -0.00031 (-0.00040, -0.00021) |                                 |
| Age x diabetes                       | -                        | 0.990 (0.985, 0.995)  | -0.01027 (-0.01511, -0.00544) |                                 |
| Age x HDL-C                          | -                        | 1.000 (1.000, 1.000)  | 0.00033 (0.00018, 0.00049)    |                                 |
| Age x LDL-C                          | -                        | 1.000 (1.000, 1.000)  | -0.00019 (-0.00025, -0.00014) |                                 |
| Risk function: Incident stroke event |                          |                       |                               |                                 |
| Age                                  | Years                    | 1.146 (1.123, 1.170)  | 0.13656 (0.11627, 0.15686)    | CU-NHLBI Pooled Cohorts Dataset |
| African American                     | Binary                   | 1.605 (1.430, 1.802)  | 0.47326 (0.35738, 0.58914)    |                                 |
| Current smoker                       | Binary                   | 1.868 (1.667, 2.094)  | 0.62513 (0.51121, 0.73906)    |                                 |
| Systolic blood pressure              | mmHg                     | 1.020 (1.018, 1.022)  | 0.01988 (0.01773, 0.02202)    |                                 |
| Diabetes                             | Binary                   | 1.950 (1.751, 2.171)  | 0.66772 (0.56039, 0.77505)    |                                 |
| HDL-C                                | mg/dL                    | 0.995 (0.992, 0.998)  | -0.00472 (-0.00779, -0.00165) |                                 |



| Parameter                               | Description              | Hazard Ratio (95% CI) | Beta Value (95% CI)           | Source                          |
|-----------------------------------------|--------------------------|-----------------------|-------------------------------|---------------------------------|
| LDL-C                                   | mg/dL                    | 1.002 (1.000, 1.003)  | 0.00172 (0.00049, 0.00295)    |                                 |
| eGFR                                    | mL/min/1.73 <sup>2</sup> | 0.996 (0.993, 0.998)  | -0.00421 (-0.00691, -0.00152) |                                 |
| Age x African American                  | -                        | 0.977 (0.969, 0.986)  | -0.02280 (-0.03126, -0.01435) |                                 |
| Age x current smoker                    | -                        | 0.990 (0.982, 0.999)  | -0.00955 (-0.01772, -0.00138) |                                 |
| Age x systolic blood pressure           | -                        | 1.000 (0.999, 1.000)  | -0.00042 (-0.00056, -0.00028) |                                 |
| Age x diabetes                          | -                        | 0.984 (0.977, 0.991)  | -0.01607 (-0.02356, -0.00858) |                                 |
| <b>Risk function: Non-CVD mortality</b> |                          |                       |                               |                                 |
| Age                                     | Years                    | 1.104 (1.097, 1.111)  | 0.09916 (0.09289, 0.10543)    | CU-NHLBI Pooled Cohorts Dataset |
| African American                        | Binary                   | 1.501 (1.404, 1.605)  | 0.40643 (0.33944, 0.47342)    |                                 |
| BMI                                     | kg/m <sup>2</sup>        | 0.905 (0.886, 0.925)  | -0.09962 (-0.12093, -0.07832) |                                 |
| BMI <sup>2</sup>                        | -                        | 1.001 (1.001, 1.002)  | 0.00137 (0.00106, 0.00168)    |                                 |
| Former smoker                           | Binary                   | 1.296 (1.228, 1.369)  | 0.25967 (0.20511, 0.31422)    |                                 |
| Current Smoker                          | Binary                   | 1.985 (1.792, 2.200)  | 0.68585 (0.58327, 0.78842)    |                                 |
| Cigarettes per day                      | Among current smokers    | 1.020 (1.016, 1.025)  | 0.02027 (0.01601, 0.02452)    |                                 |
| Systolic blood pressure                 | mmHg                     | 1.001 (1.000, 1.002)  | 0.00113 (-0.00010, 0.00236)   |                                 |
| Diabetes                                | Binary                   | 1.542 (1.441, 1.650)  | 0.43303 (0.36525, 0.50081)    |                                 |
| eGFR                                    | mL/min/1.73 <sup>2</sup> | 0.993 (0.992, 0.995)  | -0.00660 (-0.00815, -0.00506) |                                 |
| Age x African American                  | -                        | 0.985 (0.980, 0.989)  | -0.01530 (-0.01998, -0.01061) |                                 |
| Age x BMI <sup>2</sup>                  | -                        | 1.000 (1.000, 1.000)  | 0.00002 (0.00001, 0.00002)    |                                 |
| Age x diabetes                          | -                        | 0.989 (0.984, 0.994)  | -0.01144 (-0.01647, -0.00641) |                                 |

<sup>a</sup>Years centered around age 55

BMI – body mass index, CI – confidence interval, CU-NHLBI – Columbia University-National Heart Lung and Blood Institute, CVD – cardiovascular disease, eGFR – Estimated Glomerular Filtration Rate, HDL-C – high-density lipoprotein cholesterol, LDL-C – low-density lipoprotein cholesterol

**eTable 2. Difference between NHANES Observed and NHLBI Pooled Cohort Imputed CVD Risk Factors**

| <b>CVD Risk Factor</b>              | <b>Mean Difference (NHANES – NHLBI Pooled Cohort)</b> | <b>95% CI</b>    |
|-------------------------------------|-------------------------------------------------------|------------------|
| Systolic Blood Pressure             | 0.21 mm Hg                                            | 0.16 to 0.26     |
| Diastolic Blood Pressure            | -0.43 mm Hg                                           | -0.48 to -0.38   |
| Low-density lipoprotein cholesterol | -0.37 mg/dL                                           | -0.48 to -0.27   |
| 10-year atherosclerotic CVD risk    | -0.05%                                                | -0.07% to -0.04% |

NHLBI Pooled Cohort – National Heart, Lung, and Blood Institute Pooled Cohorts Project at Columbia University; CVD – cardiovascular disease; NHANES – National Health and Nutrition Examination Survey; 95% CI – 95% confidence interval.

**eTable 3. Probabilities for Non-incident CHD and Stroke Events in the CVD Policy Model Microsimulation Version**

| Parameter                                                           | Base Case Value (%) | Source |
|---------------------------------------------------------------------|---------------------|--------|
| Following CHD event (annual probability)                            |                     |        |
| Recurrent <sup>a</sup> CHD event within 1 year of previous CHD even |                     |        |
| Men                                                                 |                     | 24–27  |
| 40-44 years                                                         | 3.53                |        |
| 45-54 years                                                         | 4.74                |        |
| 55-64 years                                                         | 6.49                |        |
| 65-74 years                                                         | 7.96                |        |
| 75+ years                                                           | 12.8                |        |
| Women                                                               |                     |        |
| 40-44 years                                                         | 2.26                |        |
| 45-54 years                                                         | 3.96                |        |
| 55-64 years                                                         | 4.98                |        |
| 65-74 years                                                         | 8.29                |        |
| 75+ years                                                           | 13.55               |        |
| Recurrent CHD event after 1 year of previous CHD event              |                     |        |
| Men                                                                 |                     | 24–28  |
| 40-44 years                                                         | 1.22                |        |
| 45-54 years                                                         | 1.6                 |        |
| 55-64 years                                                         | 2.23                |        |
| 65-74 years                                                         | 2.79                |        |
| 75+ years                                                           | 4.53                |        |
| Women                                                               |                     |        |
| 40-44 years                                                         | 0.96                |        |
| 45-54 years                                                         | 1.25                |        |
| 55-64 years                                                         | 1.63                |        |
| 65-74 years                                                         | 2.72                |        |
| 75+ years                                                           | 4.66                |        |
| Stroke after CHD                                                    |                     |        |
| Men                                                                 |                     | 29,30  |
| 40-44 years                                                         | 0.55                |        |
| 45-54 years                                                         | 0.55                |        |

| Parameter                                   | Base Case Value (%) | Source   |
|---------------------------------------------|---------------------|----------|
| 55-64 years                                 | 0.79                |          |
| 65-74 years                                 | 0.83                |          |
| 75+ years                                   | 0.92                |          |
| Women                                       |                     |          |
| 40-44 years                                 | 0.55                |          |
| 45-54 years                                 | 0.55                |          |
| 55-64 years                                 | 0.77                |          |
| 65-74 years                                 | 0.87                |          |
| 75+ years                                   | 0.89                |          |
| Following stroke event (annual probability) |                     |          |
| Recurrent stroke event                      | 3.60                | 31       |
| CHD after stroke within 10 years            | 2.50                | 32       |
| CHD after stroke after 10 years             | 2.20                | 33       |
| 30-day case fatality rates                  |                     |          |
| Incident CHD                                |                     |          |
| Men                                         |                     | 27,34-38 |
| 40-44 years                                 | 6.62                |          |
| 45-54 years                                 | 10.31               |          |
| 55-64 years                                 | 12.31               |          |
| 65-74 years                                 | 14.66               |          |
| 75-85 years                                 | 13.00               |          |
| 85+ years                                   | 17.50               |          |
| Women                                       |                     |          |
| 40-44 years                                 | 5.00                |          |
| 45-54 years                                 | 6.94                |          |
| 55-64 years                                 | 9.29                |          |
| 65-74 years                                 | 12.69               |          |
| 75-85 years                                 | 10.57               |          |
| 85+ years                                   | 17.09               |          |
| Recurrent CHD                               |                     |          |
| Men                                         |                     | 27,34-38 |
| 40-44 years                                 | 1.58                |          |
| 45-54 years                                 | 5.54                |          |

| Parameter                                     | Base Case Value (%) | Source     |  |
|-----------------------------------------------|---------------------|------------|--|
| 55-64 years                                   | 6.98                | 38,39      |  |
| 65-74 years                                   | 9.15                |            |  |
| 75-85 years                                   | 10.31               |            |  |
| 85+ years                                     | 17.50               |            |  |
| Women                                         |                     |            |  |
| 40-44 years                                   | 5.00                |            |  |
| 45-54 years                                   | 6.94                |            |  |
| 55-64 years                                   | 9.29                |            |  |
| 65-74 years                                   | 12.69               |            |  |
| 75-85 years                                   | 10.57               |            |  |
| 85+ years                                     | 17.09               |            |  |
| Any stroke                                    |                     |            |  |
| Men                                           |                     |            |  |
| 40-44 years                                   | 5.94                |            |  |
| 45-54 years                                   | 7.20                |            |  |
| 55-64 years                                   | 8.53                |            |  |
| 65-74 years                                   | 13.23               |            |  |
| 75-85 years                                   | 20.20               |            |  |
| 85+ years                                     | 35.74               |            |  |
| Women                                         |                     |            |  |
| 40-44 years                                   | 13.06               |            |  |
| 45-54 years                                   | 7.10                |            |  |
| 55-64 years                                   | 10.15               |            |  |
| 65-74 years                                   | 11.36               |            |  |
| 75-85 years                                   | 21.94               |            |  |
| 85+ years                                     | 44.31               |            |  |
| Other                                         |                     |            |  |
| Maximum annual number of CVD events per cycle | 2                   | Assumption |  |

<sup>a</sup>Recurrent event occurs subsequent to primary CHD or stroke event  
CHD – coronary heart disease, CVD – cardiovascular disease

**eTable 4. Chronic and Acute Utilities Used in CVD Policy Model Microsimulation Version**

| <b>Parameter</b>             | <b>Base Case Value (QALYs)</b> | <b>Source</b> |
|------------------------------|--------------------------------|---------------|
| <b>CHD</b>                   |                                |               |
| Age 40-44                    | 0.9348                         | 13-15         |
| Age 45-54                    | 0.9374                         |               |
| Age 55-64                    | 0.9376                         |               |
| Age 65-74                    | 0.9372                         |               |
| Age 75-84                    | 0.9364                         |               |
| Age 85+                      | 0.9358                         |               |
| <b>Stroke</b>                |                                |               |
| All ages                     | 0.8835                         | 13-15         |
| <b>Acute (30-day) CHD</b>    |                                |               |
| Age 40-44                    | 0.8970                         | 13-15         |
| Age 45-54                    | 0.8862                         |               |
| Age 55-64                    | 0.8669                         |               |
| Age 65-74                    | 0.8351                         |               |
| Age 75-84                    | 0.7946                         |               |
| Age 85+                      | 0.6829                         |               |
| <b>Acute (30-day) stroke</b> |                                |               |
| All ages                     | 0.8662                         | 13-15         |

CHD – coronary heart disease, CVD – cardiovascular disease events

**eTable 5. Health State and Acute Event Costs Used in CVD Policy Model Microsimulation Version**

| Subgroup               | Cost<br>(2019 USD) | Source |
|------------------------|--------------------|--------|
| Background health cost |                    |        |
| Men                    |                    | 18     |
| 40-49 years            | 3,689              |        |
| 50-59 years            | 4,849              |        |
| 60-69 years            | 6,461              |        |
| 70-79 years            | 9,609              |        |
| 80-89 years            | 14,541             |        |
| 90+ years              | 27,874             |        |
| Women                  |                    |        |
| 40-49 years            | 5,183              |        |
| 50-59 years            | 7,034              |        |
| 60-69 years            | 10,120             |        |
| 70-79 years            | 12,426             |        |
| 80-89 years            | 18,528             |        |
| 90+ years              | 32,515             |        |
| CHD first year         |                    |        |
| Aged 40-69             | 13,273             | 18     |
| Aged 70+               | 20,284             |        |
| CHD subsequent years   |                    |        |
| Aged 40-89             | 2,711              | 18     |
| Aged 90+               | 4,262              |        |
| Acute (30-day) CHD     |                    |        |
| Men                    |                    | 16,17  |
| 40-49 years            | 8,317              |        |
| 50-59 years            | 14,135             |        |
| 60-69 years            | 20,454             |        |
| 70-79 years            | 24,131             |        |
| 80-89 years            | 25,174             |        |
| 90+ years              | 26,258             |        |
| Women                  |                    |        |
| 40-49 years            | 6,608              |        |

| Subgroup                       | Cost<br>(2019 USD) | Source |  |
|--------------------------------|--------------------|--------|--|
| 50-59 years                    | 8,874              |        |  |
| 60-69 years                    | 17,312             |        |  |
| 70-79 years                    | 22,112             |        |  |
| 80-89 years                    | 25,957             |        |  |
| 90+ years                      | 34,502             |        |  |
| <b>CHD Mortality</b>           |                    |        |  |
| <b>Men</b>                     |                    |        |  |
| 40-49 years                    | 64,209             | 16,17  |  |
| 50-59 years                    | 67,520             |        |  |
| 60-69 years                    | 73,412             |        |  |
| 70-79 years                    | 64,513             |        |  |
| 80-89 years                    | 54,473             |        |  |
| 90+ years                      | 46,475             |        |  |
| <b>Women</b>                   |                    |        |  |
| 40-49 years                    | 64,614             |        |  |
| 50-59 years                    | 56,959             |        |  |
| 60-69 years                    | 69,176             |        |  |
| 70-79 years                    | 63,939             |        |  |
| 80-89 years                    | 54,640             |        |  |
| 90+ years                      | 46,274             |        |  |
| <b>Stroke first year</b>       |                    |        |  |
| All ages                       | 20,538             | 18     |  |
| <b>Stroke subsequent years</b> |                    |        |  |
| All ages                       | 5,707              | 18     |  |
| <b>Acute (30-day) stroke</b>   |                    |        |  |
| <b>Men</b>                     |                    |        |  |
| 40-49 years                    | 26,171             | 16,17  |  |
| 50-59 years                    | 22,736             |        |  |
| 60-69 years                    | 21,228             |        |  |
| 70-79 years                    | 17,915             |        |  |
| 80+ years                      | 19,144             |        |  |
| <b>Women</b>                   |                    |        |  |
| 40-49 years                    | 25,278             |        |  |



| <b>Subgroup</b>         | <b>Cost<br/>(2019 USD)</b> | <b>Source</b> |
|-------------------------|----------------------------|---------------|
| 50-59 years             | 21,842                     |               |
| 60-69 years             | 20,336                     |               |
| 70-79 years             | 17,023                     |               |
| 80+ years               | 18,251                     |               |
| <b>Stroke Mortality</b> |                            |               |
| <b>Men</b>              |                            | 16,17         |
| 40-49 years             | 32,344                     |               |
| 50-59 years             | 30,070                     |               |
| 60-69 years             | 28,724                     |               |
| 70-79 years             | 25,763                     |               |
| 80+ years               | 26,861                     |               |
| <b>Women</b>            |                            |               |
| 40-49 years             | 32,344                     |               |
| 50-59 years             | 29,272                     |               |
| 60-69 years             | 27,926                     |               |
| 70-79 years             | 24,965                     |               |
| 80+ years               | 26,063                     |               |
| <b>Inflation factor</b> |                            |               |
| \$US2010 to \$US2019    | 1.2587                     | 19            |

CHD – coronary heart disease

**eTable 6. Comparison of CVD Policy Model Microsimulation Version and O’Sullivan et al’s Health Care Costs<sup>21</sup>**

| <b>Parameter</b>              | <b>CVD Policy Model<br/>Microsimulation Version<br/>Costs (2019 USD)</b> | <b>O’Sullivan et al.<br/>Costs (2019 USD)</b> |
|-------------------------------|--------------------------------------------------------------------------|-----------------------------------------------|
| <b>Background health cost</b> |                                                                          |                                               |
| <b>Men</b>                    |                                                                          |                                               |
| Aged 40-49 years              | 3,689                                                                    | 9,521                                         |
| Aged 50-59 years              | 4,849                                                                    | 10,895                                        |
| Aged 60-69 years              | 6,461                                                                    | 10,391                                        |
| Aged 70-79 years              | 9,609                                                                    | 8,243                                         |
| Aged 80-89 years              | 14,541                                                                   | 4,195                                         |
| <b>Women</b>                  |                                                                          |                                               |
| Aged 40-49 years              | 5,183                                                                    | 9,411                                         |
| Aged 50-59 years              | 7,034                                                                    | 10,759                                        |
| Aged 60-69 years              | 10,120                                                                   | 10,260                                        |
| Aged 70-79 years              | 12,426                                                                   | 8,141                                         |
| Aged 80-89 years              | 18,528                                                                   | 4,149                                         |
| <b>CHD first year</b>         |                                                                          |                                               |
| Aged 40-69 years              | 13,273                                                                   | 11,083                                        |
| Aged 70+ years                | 20,284                                                                   | 9,701                                         |
| <b>CHD subsequent years</b>   |                                                                          |                                               |
| Aged 40-89 years              | 2,711                                                                    | 792                                           |
| <b>Acute (30-day) CHD</b>     |                                                                          |                                               |
| <b>Men</b>                    |                                                                          |                                               |
| Aged 40-49 years              | 8,317                                                                    | 25,664                                        |
| Aged 50-59 years              | 14,135                                                                   | 29,126                                        |
| Aged 60-69 years              | 20,454                                                                   | 27,112                                        |
| Aged 70-79 years              | 24,131                                                                   | 19,752                                        |
| Aged 80-89 years              | 25,174                                                                   | 17,116                                        |
| <b>Women</b>                  |                                                                          |                                               |
| Aged 40-49 years              | 6,608                                                                    | 23,524                                        |
| Aged 50-59 years              | 8,874                                                                    | 27,309                                        |
| Aged 60-69 years              | 17,312                                                                   | 25,753                                        |
| Aged 70-79 years              | 22,112                                                                   | 18,886                                        |
| Aged 80-89 years              | 25,957                                                                   | 19,337                                        |
| <b>CHD Mortality</b>          |                                                                          |                                               |
| <b>Men</b>                    |                                                                          |                                               |
| Aged 40-49 years              | 64,209                                                                   | 45,467                                        |

| <b>Parameter</b>               | <b>CVD Policy Model<br/>Microsimulation Version<br/>Costs (2019 USD)</b> | <b>O'Sullivan et al.<br/>Costs (2019 USD)</b> |
|--------------------------------|--------------------------------------------------------------------------|-----------------------------------------------|
| Aged 50-59 years               | 67,520                                                                   | 50,447                                        |
| Aged 60-69 years               | 73,412                                                                   | 45,401                                        |
| Aged 70-79 years               | 64,513                                                                   | 33,357                                        |
| Aged 80-89 years               | 54,473                                                                   | 20,045                                        |
| <b>Women</b>                   |                                                                          |                                               |
| Aged 40-49 years               | 64,614                                                                   | 40,709                                        |
| Aged 50-59 years               | 56,959                                                                   | 45,268                                        |
| Aged 60-69 years               | 69,176                                                                   | 40,768                                        |
| Aged 70-79 years               | 63,939                                                                   | 29,961                                        |
| Aged 80-89 years               | 54,640                                                                   | 18,006                                        |
| <b>Stroke first year</b>       |                                                                          |                                               |
| All ages                       | 20,538                                                                   | 2,840                                         |
| <b>Stroke subsequent years</b> |                                                                          |                                               |
| All ages                       | 5,707                                                                    | -463                                          |
| <b>Acute (30-day) stroke</b>   |                                                                          |                                               |
| <b>Men</b>                     |                                                                          |                                               |
| Aged 40-49 years               | 26,171                                                                   | 14,474                                        |
| Aged 50-59 years               | 22,736                                                                   | 9,804                                         |
| Aged 60-69 years               | 21,228                                                                   | 4,944                                         |
| Aged 70-79 years               | 17,915                                                                   | 1,782                                         |
| Aged 80+ years                 | 19,144                                                                   | 414                                           |
| <b>Women</b>                   |                                                                          |                                               |
| Aged 40-49 years               | 25,278                                                                   | 13,550                                        |
| Aged 50-59 years               | 21,842                                                                   | 10,578                                        |
| Aged 60-69 years               | 20,336                                                                   | 6,105                                         |
| Aged 70-79 years               | 17,023                                                                   | 2,378                                         |
| Aged 80+ years                 | 18,251                                                                   | 570                                           |
| <b>Stroke Mortality</b>        |                                                                          |                                               |
| <b>Men</b>                     |                                                                          |                                               |
| Aged 40-49 years               | 32,344                                                                   | 93,127                                        |
| Aged 50-59 years               | 30,070                                                                   | 67,650                                        |
| Aged 60-69 years               | 28,724                                                                   | 57,906                                        |
| Aged 70-79 years               | 25,763                                                                   | 58,173                                        |
| Aged 80+ years                 | 26,861                                                                   | 70,710                                        |
| <b>Women</b>                   |                                                                          |                                               |
| Aged 40-49 years               | 32,344                                                                   | 100,245                                       |

| <b>Parameter</b> | <b>CVD Policy Model<br/>Microsimulation Version<br/>Costs (2019 USD)</b> | <b>O'Sullivan et al.<br/>Costs (2019 USD)</b> |
|------------------|--------------------------------------------------------------------------|-----------------------------------------------|
| Aged 50-59 years | 29,272                                                                   | 72,388                                        |
| Aged 60-69 years | 27,926                                                                   | 61,912                                        |
| Aged 70-79 years | 24,965                                                                   | 62,511                                        |
| Aged 80+ years   | 26,063                                                                   | 76,495                                        |

**eTable 7. Statin-Intensity Classifications**

|                       | <b>High-intensity</b>                          | <b>Moderate-intensity</b>                                                                                   |
|-----------------------|------------------------------------------------|-------------------------------------------------------------------------------------------------------------|
| <b><i>Statins</i></b> | Atorvastatin 40-80 mg<br>Rosuvastatin 20-40 mg | Atorvastatin 10-20 mg<br>Lovastatin 40 mg<br>Pravastatin 40 mg<br>Rosuvastatin 5-10 mg<br>Simvastatin 40 mg |

**eTable 8. Characteristics of the Simulation Cohort at Ages 40, 50, and 60 Years without Statin Treatment**

| Characteristics                       | Women                   |         |         | Men                     |         |         | Total                   |         |         |
|---------------------------------------|-------------------------|---------|---------|-------------------------|---------|---------|-------------------------|---------|---------|
|                                       | Simulation baseline age |         |         | Simulation baseline age |         |         | Simulation baseline age |         |         |
|                                       | 40                      | 50      | 60      | 40                      | 50      | 60      | 40                      | 50      | 60      |
| N CVD-free                            | 500,000                 | 475,192 | 432,687 | 500,000                 | 453,465 | 381,872 | 1,000,000               | 928,630 | 814,131 |
| Mortality from age 40 (%)             | 0.0                     | 1.7     | 5.8     | 0.0                     | 3.1     | 10.2    | 0.0                     | 2.4     | 8.0     |
| CVD event from age 40 (%)             | 0.0                     | 3.6     | 8.8     | 0.0                     | 7.0     | 16.3    | 0.0                     | 5.3     | 12.6    |
| Ten-year ASCVD risk (%)               |                         |         |         |                         |         |         |                         |         |         |
| Mean                                  | 1.0                     | 1.9     | 4.5     | 2.5                     | 5.2     | 10.6    | 1.8                     | 3.5     | 7.4     |
| Category                              |                         |         |         |                         |         |         |                         |         |         |
| <2.5 %                                | 89.5                    | 78.7    | 20.8    | 64.5                    | 13.0    | 0.0     | 77.0                    | 46.7    | 11.0    |
| 2.5-4.9 %                             | 8.5                     | 15.9    | 52.8    | 23.0                    | 47.6    | 2.1     | 15.7                    | 31.4    | 29.1    |
| 5.0-7.4 %                             | 1.6                     | 3.8     | 14.6    | 9.9                     | 21.9    | 22.8    | 5.8                     | 12.6    | 18.5    |
| ≥7.5%                                 | 0.3                     | 1.6     | 11.8    | 2.6                     | 17.4    | 75.1    | 1.5                     | 9.3     | 41.5    |
| LDL Cholesterol (mg/dL)               |                         |         |         |                         |         |         |                         |         |         |
| Mean                                  | 122.8                   | 125.8   | 123.8   | 128.9                   | 127.9   | 120.5   | 125.8                   | 126.9   | 122.3   |
| Category                              |                         |         |         |                         |         |         |                         |         |         |
| <100 mg/dL                            | 24.1                    | 23.0    | 24.1    | 19.4                    | 21.5    | 26.8    | 21.7                    | 22.2    | 25.4    |
| 100-129 mg/dL                         | 36.7                    | 34.8    | 36.8    | 33.6                    | 33.8    | 38.1    | 35.1                    | 34.3    | 37.4    |
| 130-159 mg/dL                         | 27.5                    | 27.0    | 25.3    | 30.4                    | 27.8    | 24.2    | 29.0                    | 27.4    | 24.8    |
| ≥160 mg/dL                            | 11.7                    | 15.3    | 13.8    | 16.6                    | 16.9    | 10.8    | 14.1                    | 16.1    | 12.4    |
| HDL Cholesterol (mean, mg/dL)         | 54.6                    | 56.7    | 58.4    | 43.8                    | 44.6    | 45.9    | 49.2                    | 50.8    | 52.5    |
| Cigarettes Per Day (mean)             | 4.6                     | 3.0     | 1.6     | 7.4                     | 4.1     | 2.0     | 6.0                     | 3.5     | 1.8     |
| Systolic Blood Pressure (mean, mm Hg) | 114.4                   | 119.1   | 124.1   | 119.7                   | 121.9   | 124.1   | 117.1                   | 120.5   | 124.2   |
| African American (%)                  | 11.3                    | 11.1    | 10.7    | 10.5                    | 10.2    | 9.8     | 10.9                    | 10.7    | 10.3    |
| Diabetes (%)                          | 2.7                     | 6.8     | 13.1    | 2.8                     | 8.1     | 16.2    | 2.8                     | 7.4     | 14.5    |

ASCVD – atherosclerotic cardiovascular disease, CVD – cardiovascular disease, HDL – high-density lipoprotein cholesterol, LDL – low-density lipoprotein cholesterol.

Notes: All individuals started the simulation at age 40. Estimates at ages 50 and 60 years represent a scenario assuming that no individuals started statin treatment.

**eTable 9. Number of ASCVD Events Prevented Over 10 Years for Risk- and Cholesterol-Based Statin Treatment Strategies**

| <b>Policy</b>                                       | <b>Total ASCVD Events</b> | <b>ASCVD Events Prevented</b> |
|-----------------------------------------------------|---------------------------|-------------------------------|
| <b>Women</b>                                        |                           |                               |
| Standard Care                                       | 20,384                    | Reference                     |
| Add AR <sub>10</sub> 5.0-7.4% & LDL-C 160-189 mg/dL | 20,331                    | 53                            |
| Add AR <sub>10</sub> 5.0-7.4% & LDL-C 130-159 mg/dL | 20,293                    | 91                            |
| Add remainder AR <sub>10</sub> ≥5.0%                | 20,275                    | 109                           |
| <b>Men</b>                                          |                           |                               |
| Standard Care                                       | 40,037                    | Reference                     |
| Add AR <sub>10</sub> 5.0-7.4% & LDL-C 160-189 mg/dL | 39,844                    | 193                           |
| Add AR <sub>10</sub> 5.0-7.4% & LDL-C 130-159 mg/dL | 39,528                    | 509                           |
| Add remainder AR <sub>10</sub> ≥5.0%                | 39,284                    | 753                           |
| <b>Combined women and men</b>                       |                           |                               |
| Standard Care                                       | 60,421                    | Reference                     |
| Add AR <sub>10</sub> 5.0-7.4% & LDL-C 160-189 mg/dL | 60,175                    | 246                           |
| Add AR <sub>10</sub> 5.0-7.4% & LDL-C 130-159 mg/dL | 59,821                    | 600                           |
| Add remainder AR <sub>10</sub> ≥5.0%                | 59,559                    | 862                           |

Cohort includes 500,000 U.S. men and 500,000 U.S. women aged 40 years at baseline.

**eTable 10. Scenario Analyses Showing the Costs, QALYs, and ICERs When Changing Model Assumptions**

| Scenario                          | Cost (2019 USD) |                 |                 |                 | QALYs      |            |            |            |
|-----------------------------------|-----------------|-----------------|-----------------|-----------------|------------|------------|------------|------------|
|                                   | SC              | A               | B               | C               | SC         | A          | B          | C          |
| <b>Women</b>                      |                 |                 |                 |                 |            |            |            |            |
| Base case                         | 125,046,215,620 | 125,044,868,352 | 125,048,146,932 | 125,060,057,499 | 2,309,786  | 2,309,798  | 2,309,818  | 2,309,917  |
| No monitoring costs               | 124,896,551,652 | 124,890,109,674 | 124,879,012,762 | 124,873,887,014 | 11,582,459 | 11,582,673 | 11,582,850 | 11,583,006 |
| Myalgia <sup>a</sup>              | 125,046,215,620 | 125,044,868,352 | 125,048,146,932 | 125,060,057,499 | 11,581,615 | 11,581,911 | 11,582,130 | 11,582,092 |
| Statin Cost: \$1,520 <sup>b</sup> | 128,219,707,649 | 128,329,107,200 | 128,515,004,130 | 128,841,891,397 | 11,582,459 | 11,582,673 | 11,582,850 | 11,583,006 |
| Statin Cost: \$3,040 <sup>b</sup> | 131,651,087,145 | 131,878,788,899 | 132,265,868,358 | 132,934,182,686 | 11,582,459 | 11,582,673 | 11,582,850 | 11,583,006 |
| Time horizon: 10 years            | 26,828,969,558  | 26,829,991,372  | 26,831,369,218  | 26,831,216,213  | 4,296,105  | 4,296,093  | 4,296,096  | 4,296,097  |
| Time horizon: 20 years            | 54,809,393,337  | 54,811,330,418  | 54,814,269,002  | 54,817,199,631  | 7,397,990  | 7,398,013  | 7,398,008  | 7,398,018  |
| Time horizon: 30 years            | 81,219,095,147  | 81,221,362,487  | 81,227,372,050  | 81,244,784,005  | 9,535,694  | 9,535,730  | 9,535,668  | 9,535,610  |
| Time horizon: 40 years            | 105,224,249,254 | 105,221,865,863 | 105,224,787,519 | 105,236,407,146 | 10,895,864 | 10,896,034 | 10,896,203 | 10,896,193 |
| Full Adherence                    | 125,095,312,285 | 125,099,748,824 | 125,111,515,004 | 125,143,935,281 | 11,587,880 | 11,588,599 | 11,589,241 | 11,589,781 |
| <b>Men</b>                        |                 |                 |                 |                 |            |            |            |            |
| Base case                         | 90,574,138,606  | 90,562,851,415  | 90,558,695,685  | 90,581,623,102  | 2,170,436  | 2,170,641  | 2,170,940  | 2,171,203  |
| No monitoring costs               | 90,450,643,674  | 90,437,248,250  | 90,417,941,299  | 90,402,809,391  | 10,914,126 | 10,915,020 | 10,916,180 | 10,917,063 |
| Myalgia <sup>a</sup>              | 90,574,138,606  | 90,562,851,415  | 90,558,695,685  | 90,581,623,102  | 10,913,484 | 10,914,352 | 10,915,458 | 10,916,246 |
| Statin Cost: \$1,520 <sup>b</sup> | 95,459,924,539  | 95,651,271,081  | 96,061,038,352  | 96,787,395,093  | 10,914,126 | 10,915,020 | 10,916,180 | 10,917,063 |
| Statin Cost: \$3,040 <sup>b</sup> | 100,639,873,478 | 101,039,887,538 | 101,887,042,846 | 103,371,112,738 | 10,914,126 | 10,915,020 | 10,916,180 | 10,917,063 |
| Time horizon: 10 years            | 19,691,419,027  | 19,693,529,415  | 19,700,079,764  | 19,712,246,483  | 4,266,764  | 4,266,804  | 4,266,708  | 4,266,614  |
| Time horizon: 20 years            | 39,592,522,000  | 39,593,444,718  | 39,608,368,166  | 39,642,565,685  | 7,272,948  | 7,273,176  | 7,273,270  | 7,273,116  |
| Time horizon: 30 years            | 59,576,426,780  | 59,571,776,700  | 59,578,923,247  | 59,611,671,677  | 9,268,829  | 9,269,188  | 9,269,961  | 9,270,153  |
| Time horizon: 40 years            | 78,010,207,671  | 78,001,948,115  | 77,998,313,761  | 78,015,922,769  | 10,438,582 | 10,439,111 | 10,439,775 | 10,439,998 |



| Scenario                          | Cost (2019 USD) |                 |                 |                 | QALYs      |            |            |            |
|-----------------------------------|-----------------|-----------------|-----------------|-----------------|------------|------------|------------|------------|
|                                   | SC              | A               | B               | C               | SC         | A          | B          | C          |
| Full Adherence                    | 90,588,280,900  | 90,578,538,237  | 90,592,747,589  | 90,657,399,704  | 10,925,778 | 10,927,150 | 10,929,226 | 10,930,520 |
| <b>Combined women and men</b>     |                 |                 |                 |                 |            |            |            |            |
| Base case                         | 215,620,354,226 | 215,607,719,767 | 215,606,842,617 | 215,641,680,601 | 4,480,222  | 4,480,439  | 4,480,759  | 4,481,120  |
| No monitoring costs               | 215,347,195,327 | 215,327,357,925 | 215,296,954,062 | 215,276,696,405 | 22,496,585 | 22,497,693 | 22,499,030 | 22,500,068 |
| Myalgia <sup>a</sup>              | 215,620,354,226 | 215,607,719,767 | 215,606,842,617 | 215,641,680,601 | 22,495,099 | 22,496,263 | 22,497,587 | 22,498,338 |
| Statin Cost: \$1,520 <sup>b</sup> | 223,679,632,188 | 223,980,378,282 | 224,576,042,482 | 225,629,286,491 | 22,496,585 | 22,497,693 | 22,499,030 | 22,500,068 |
| Statin Cost: \$3,040 <sup>b</sup> | 232,290,960,623 | 232,918,676,437 | 234,152,911,204 | 236,305,295,424 | 22,496,585 | 22,497,693 | 22,499,030 | 22,500,068 |
| Time horizon: 10 years            | 46,520,388,585  | 46,523,520,787  | 46,531,448,982  | 46,543,462,696  | 8,562,870  | 8,562,897  | 8,562,804  | 8,562,712  |
| Time horizon: 20 years            | 94,401,915,337  | 94,404,775,135  | 94,422,637,169  | 94,459,765,316  | 14,670,938 | 14,671,189 | 14,671,278 | 14,671,134 |
| Time horizon: 30 years            | 140,795,521,927 | 140,793,139,186 | 140,806,295,297 | 140,856,455,682 | 18,804,523 | 18,804,919 | 18,805,629 | 18,805,763 |
| Time horizon: 40 years            | 183,234,456,925 | 183,223,813,978 | 183,223,101,281 | 183,252,329,916 | 21,334,446 | 21,335,145 | 21,335,978 | 21,336,190 |
| Full Adherence                    | 215,683,593,185 | 215,678,287,061 | 215,704,262,593 | 215,801,334,985 | 22,513,659 | 22,515,749 | 22,518,467 | 22,520,301 |

<sup>a</sup>Utility decrements applied to persistent statin users for mild and severe adverse events

<sup>b</sup>Statin cost per year

A – standard care plus treat all borderline risk with LDL-C 160-189 mg/dL, B - standard care plus treat all borderline risk with LDL-C 130-159 mg/dL, C - standard care plus treat all borderline risk

**eTable 11. Scenario Analyses Showing the ICERs When Changing Model Assumptions**

| Scenario                          | ICER (\$ per QALY gained) |               |               |               |
|-----------------------------------|---------------------------|---------------|---------------|---------------|
|                                   | SC                        | A             | B             | C             |
| <b>Women</b>                      |                           |               |               |               |
| Base case                         | Ref                       | Cost-Saving   | 18,487        | 76,576        |
| No monitoring costs               | Ref                       | Cost-Saving   | Cost-Saving   | Cost-Saving   |
| Myalgia <sup>a</sup>              | Ref                       | Cost-Saving   | 14,988        | Str Dominated |
| Statin Cost: \$1,520 <sup>b</sup> | Ref                       | 510,965       | 1,048,214     | 2,101,641     |
| Statin Cost: \$3,040 <sup>b</sup> | Ref                       | 1,063,511     | 2,182,618     | 4,296,761     |
| Time horizon: 10 years            | Ref                       | Str Dominated | Str Dominated | Str Dominated |
| Time horizon: 20 years            | Ref                       | 85,417        | Str Dominated | 1,179,389     |
| Time horizon: 30 years            | Ref                       | 62,125        | Str Dominated | Str Dominated |
| Time horizon: 40 years            | Ref                       | Cost-Saving   | 17,258        | Str Dominated |
| Full Adherence                    | Ref                       | 6,171         | 18,334        | 60,069        |
| <b>Men</b>                        |                           |               |               |               |
| Base case                         | Ref                       | Cost-Saving   | Cost-Saving   | 25,977        |
| No monitoring costs               | Ref                       | Cost-Saving   | Cost-Saving   | Cost-Saving   |
| Myalgia <sup>a</sup>              | Ref                       | Cost-Saving   | Cost-Saving   | 29,073        |
| Statin Cost: \$1,520 <sup>b</sup> | Ref                       | 213,928       | 353,296       | 822,973       |
| Statin Cost: \$3,040 <sup>b</sup> | Ref                       | 447,221       | 730,406       | 1,681,473     |
| Time horizon: 10 years            | Ref                       | 52,962        | Str Dominated | Str Dominated |
| Time horizon: 20 years            | Ref                       | 4,051         | 159,295       | Str Dominated |
| Time horizon: 30 years            | Ref                       | Cost-Saving   | 9,250         | 170,592       |
| Time horizon: 40 years            | Ref                       | Cost-Saving   | Cost-Saving   | 79,175        |
| Full Adherence                    | Ref                       | Cost-Saving   | 6,844         | 49,933        |
| <b>Combined women and men</b>     |                           |               |               |               |
| Base case                         | Ref                       | Cost-Saving   | Cost-Saving   | 33,558        |
| No monitoring costs               | Ref                       | Cost-Saving   | Cost-Saving   | Cost-Saving   |
| Myalgia <sup>a</sup>              | Ref                       | Cost-Saving   | Cost-Saving   | 46,410        |
| Statin Cost: \$1,520 <sup>b</sup> | Ref                       | 271,298       | 445,460       | 1,014,549     |
| Statin Cost: \$3,040 <sup>b</sup> | Ref                       | 566,251       | 923,007       | 2,073,308     |
| Time horizon: 10 years            | Ref                       | 113,690       | Str Dominated | Str Dominated |
| Time horizon: 20 years            | Ref                       | 11,419        | 201,162       | Str Dominated |
| Time horizon: 30 years            | Ref                       | Cost-Saving   | 18,525        | 374,098       |
| Time horizon: 40 years            | Ref                       | Cost-Saving   | Cost-Saving   | 137,950       |
| Full Adherence                    | Ref                       | Cost-Saving   | Cost-Saving   | 52,915        |

<sup>a</sup>Utility decrements applied to persistent statin users for mild and severe adverse events

<sup>b</sup>Statin cost per year

A – standard care plus treat all borderline risk with LDL-C 160-189 mg/dL, B - standard care plus treat all borderline risk with LDL-C 130-159 mg/dL, C - standard care plus treat all borderline risk, ICER – incremental cost-effectiveness ratio, SC – standard care, Str Dominated – strictly dominated

© 2019 American Medical Association. All rights reserved.

**eTable 12. Cost-Effectiveness of Statins for Borderline Risk Individuals with Chronic Kidney Disease<sup>a</sup>**

| Policy                              | Years of Treatment Eligibility | ASCVD Events | Discounted QALYs | Discounted Costs (2019 USD) | ICER (\$/QALY) |
|-------------------------------------|--------------------------------|--------------|------------------|-----------------------------|----------------|
| <b>Women</b>                        |                                |              |                  |                             |                |
| Standard Care                       | 8,485,471                      | 354,209      | 11,582,459       | 125,046,215,620             | Reference      |
| Add AR <sub>10</sub> 5.0-7.4% & CKD | 8,670,735                      | 353,921      | 11,582,669       | 125,048,782,218             | 12,220         |
| <b>Men</b>                          |                                |              |                  |                             |                |
| Standard Care                       | 11,153,224                     | 480,658      | 10,914,126       | 90,574,138,606              | Reference      |
| Add AR <sub>10</sub> 5.0-7.4% & CKD | 11,216,220                     | 480,590      | 10,914,233       | 90,574,361,157              | 2,080          |
| <b>Combined women and men</b>       |                                |              |                  |                             |                |
| Standard Care                       | 19,638,695                     | 834,867      | 22,496,585       | 215,620,354,226             | Reference      |
| Add AR <sub>10</sub> 5.0-7.4% & CKD | 19,886,955                     | 834,511      | 22,496,902       | 215,623,143,375             | 8,798          |

AR<sub>10</sub> – 10-year absolute atherosclerotic cardiovascular disease risk, ASCVD – atherosclerotic cardiovascular disease, CKD – chronic kidney disease, defined as eGFR < 60 mL/min/1.73 m<sup>2</sup>, ICER – incremental cost-effectiveness ratio, QALY – quality-adjusted life years.

<sup>a</sup>eGFR < 60 mL/min/1.73 m<sup>2</sup>

**eTable 13. Consolidated Health Economic Evaluation Reporting Standards (CHEERS) Statement**

| <b>Section/item</b>             | <b>Item No</b> | <b>Recommendation</b>                                                                                                                                                                   | <b>Reported on page, line number(s), figure, table</b> |
|---------------------------------|----------------|-----------------------------------------------------------------------------------------------------------------------------------------------------------------------------------------|--------------------------------------------------------|
| <b>Title and abstract</b>       |                |                                                                                                                                                                                         |                                                        |
| Title                           | 1              | Identify the study as an economic evaluation or use more specific terms such as “cost-effectiveness analysis”, and describe the interventions compared.                                 | Title page (Page 1)<br>(line 1)                        |
| Abstract                        | 2              | Provide a structured summary of objectives, perspective, setting, methods (including study design and inputs), results (including base case and uncertainty analyses), and conclusions. | page 3, lines 1-43                                     |
| <b>Introduction</b>             |                |                                                                                                                                                                                         |                                                        |
| Background and objectives       | 3              | Provide an explicit statement of the broader context for the study.                                                                                                                     | page 4, lines 3-20                                     |
|                                 |                | Present the study question and its relevance for health policy or practice decisions.                                                                                                   | page 4, lines 20-26                                    |
| <b>Methods</b>                  |                |                                                                                                                                                                                         |                                                        |
| Target population and subgroups | 4              | Describe characteristics of the base case population and subgroups analysed, including why they were chosen.                                                                            | page 6, lines 17-22                                    |
|                                 |                |                                                                                                                                                                                         | page 6, lines 31-41                                    |
|                                 |                |                                                                                                                                                                                         | page 7, lines 1-3                                      |
|                                 |                |                                                                                                                                                                                         | page 7, lines 5-7<br>supplement, eTable 8              |
| Setting and location            | 5              | State relevant aspects of the system(s) in which the decision(s) need(s) to be made.                                                                                                    | page 6, lines 31-37                                    |
| Study perspective               | 6              | Describe the perspective of the study and relate this to the costs being evaluated.                                                                                                     | page 8, lines 1-8                                      |
| Comparators                     | 7              | Describe the interventions or strategies being compared and state why they were chosen.                                                                                                 | page 6, line 31<br>- page 7, line 7                    |
| Time horizon                    | 8              | State the time horizon(s) over which costs and consequences are being evaluated and say why appropriate.                                                                                | page 5, line 22                                        |
|                                 |                |                                                                                                                                                                                         | page 5, line 35                                        |

| Section/item                                           | Item No | Recommendation                                                                                                                                                                                                                                                                                                              | Reported on page, line number(s), figure, table                                                                       |
|--------------------------------------------------------|---------|-----------------------------------------------------------------------------------------------------------------------------------------------------------------------------------------------------------------------------------------------------------------------------------------------------------------------------|-----------------------------------------------------------------------------------------------------------------------|
| Discount rate                                          | 9       | Report the choice of discount rate(s) used for costs and outcomes and say why appropriate.                                                                                                                                                                                                                                  | page 8, line 5                                                                                                        |
| Choice of health outcomes                              | 10      | Describe what outcomes were used as the measure(s) of benefit in the evaluation and their relevance for the type of analysis performed.                                                                                                                                                                                     | page 4, line 30<br>page 8, line 1<br>eMethods, page 7<br>...lines 20-25                                               |
| Measurement of effectiveness                           | 11a     | <i>Single study-based estimates:</i> Describe fully the design features of the single effectiveness study and why the single study was a sufficient source of clinical effectiveness data.                                                                                                                                  | Not applicable                                                                                                        |
|                                                        | 11b     | <i>Synthesis-based estimates:</i> Describe fully the methods used for identification of included studies and synthesis of clinical effectiveness data.                                                                                                                                                                      | page 7, lines 9-38                                                                                                    |
| Measurement and valuation of preference based outcomes | 12      | If applicable, describe the population and methods used to elicit preferences for outcomes.                                                                                                                                                                                                                                 | page 6, lines 11-13<br>eMethods, page 7<br>...lines 26-32<br>eTable 4                                                 |
| Estimating resources and costs                         | 13a     | <i>Single study-based economic evaluation:</i> Describe approaches used to estimate resource use associated with the alternative interventions. Describe primary or secondary research methods for valuing each resource item in terms of its unit cost. Describe any adjustments made to approximate to opportunity costs. | not applicable                                                                                                        |
|                                                        | 13b     | <i>Model-based economic evaluation:</i> Describe approaches and data sources used to estimate resource use associated with model health states. Describe primary or secondary research methods for valuing each resource item in terms of its unit cost. Describe any adjustments made to approximate to opportunity costs. | page 4, lines 34-46<br>eMethods, page 7<br>(lines 34-42)<br>eMethods, page 8<br>(lines 16-40)<br>supplement, eTable 7 |

| Section/item                         | Item No | Recommendation                                                                                                                                                                                                                                                                                                                                        | Reported on page, line number(s), figure, table                   |
|--------------------------------------|---------|-------------------------------------------------------------------------------------------------------------------------------------------------------------------------------------------------------------------------------------------------------------------------------------------------------------------------------------------------------|-------------------------------------------------------------------|
| Currency, price date, and conversion | 14      | Report the dates of the estimated resource quantities and unit costs. Describe methods for adjusting estimated unit costs to the year of reported costs if necessary. Describe methods for converting costs into a common currency base and the exchange rate.                                                                                        | page 8, line 1<br>supplement, page 7<br>(lines 40-42)<br>eTable 5 |
| Choice of model                      | 15      | Describe and give reasons for the specific type of decision-analytical model used. Providing a figure to show model structure is strongly recommended.                                                                                                                                                                                                | page 5, lines 30<br>-page 6, line 13<br>Figure 1<br>eFigure 1     |
| Assumptions                          | 16      | Describe all structural or other assumptions underpinning the decision-analytical model.                                                                                                                                                                                                                                                              | page 5, lines 30-40<br>Table 1<br>eMethods                        |
| Analytical methods                   | 17      | Describe all analytical methods supporting the evaluation. This could include methods for dealing with skewed, missing, or censored data; extrapolation methods; methods for pooling data; approaches to validate or make adjustments (such as half cycle corrections) to a model; and methods for handling population heterogeneity and uncertainty. | page 6, lines 15-27<br>page 8, lines 16-27<br>eMethods            |
| <b>Results</b>                       |         |                                                                                                                                                                                                                                                                                                                                                       |                                                                   |
| Study parameters                     | 18      | Report the values, ranges, references, and, if used, probability distributions for all parameters. Report reasons or sources for distributions used to represent uncertainty where appropriate. Providing a table to show the input values is strongly recommended.                                                                                   | page 7, lines 9-38<br>Table 1                                     |
| Incremental costs and outcomes       | 19      | For each intervention, report mean values for the main categories of estimated costs and outcomes of interest, as well as mean differences between the comparator groups. If applicable, report incremental cost-effectiveness ratios.                                                                                                                | page 9, line 31<br>-page 9, line 13<br>Table 2                    |
|                                      | 20a     | <i>Single study-based economic evaluation:</i><br>Describe the effects of sampling                                                                                                                                                                                                                                                                    | not applicable                                                    |

| <b>Section/item</b>                                                  | <b>Item No</b> | <b>Recommendation</b>                                                                                                                                                                                                                                                      | <b>Reported on page, line number(s), figure, table</b> |
|----------------------------------------------------------------------|----------------|----------------------------------------------------------------------------------------------------------------------------------------------------------------------------------------------------------------------------------------------------------------------------|--------------------------------------------------------|
| Characterising uncertainty                                           |                | uncertainty for the estimated incremental cost and incremental effectiveness parameters, together with the impact of methodological assumptions (such as discount rate, study perspective).                                                                                |                                                        |
|                                                                      | 20b            | <i>Model-based economic evaluation:</i> Describe the effects on the results of uncertainty for all input parameters, and uncertainty related to the structure of the model and assumptions.                                                                                | page 10, lines 1-25<br>eFigures 5-8                    |
| Characterising heterogeneity                                         | 21             | If applicable, report differences in costs, outcomes, or cost-effectiveness that can be explained by variations between subgroups of patients with different baseline characteristics or other observed variability in effects that are not reducible by more information. | page 9, lines 16-39<br>figure 2<br>figure 3            |
| <b>Discussion</b>                                                    |                |                                                                                                                                                                                                                                                                            |                                                        |
| Study findings, limitations, generalisability, and current knowledge | 22             | Summarise key study findings and describe how they support the conclusions reached. Discuss limitations and the generalisability of the findings and how the findings fit with current knowledge.                                                                          | page 10, lines 27<br>-page 12, line 17                 |
| <b>Other</b>                                                         |                |                                                                                                                                                                                                                                                                            |                                                        |
| Source of funding                                                    | 23             | Describe how the study was funded and the role of the funder in the identification, design, conduct, and reporting of the analysis. Describe other non-monetary sources of support.                                                                                        | page 12, lines 28-33                                   |
| Conflicts of interest                                                | 24             | Describe any potential for conflict of interest of study contributors in accordance with journal policy. In the absence of a journal policy, we recommend authors comply with International Committee of Medical Journal Editors recommendations.                          | page 12, lines 35-39                                   |

**eTable 14. Cross-Validation of the CVD Policy Model Microsimulation Version vs Pandya et al's ASCVD Risk Threshold Statin Cost-Effectiveness Analysis<sup>22</sup>**

| Policy                                                | Patient-Years of Treatment Eligibility | ASCVD Events | Discounted QALYs | Discounted Costs (2013 USD) | ICER <sup>a</sup> (\$/QALY) | Pandya et al.'s ICER |
|-------------------------------------------------------|----------------------------------------|--------------|------------------|-----------------------------|-----------------------------|----------------------|
| <b>Combined cohort of women and men (n=1,000,000)</b> |                                        |              |                  |                             |                             |                      |
| AR <sub>10</sub> ≥20%                                 | 11,559,746                             | 824,563      | 19,312,248       | 16,940,016,282              | Reference                   | Reference            |
| AR <sub>10</sub> ≥10%                                 | 16,806,964                             | 813,328      | 19,320,212       | 17,040,121,459              | 12,570                      | 9,300                |
| AR <sub>10</sub> ≥7.5%                                | 19,442,914                             | 808,759      | 19,324,540       | 17,124,933,191              | 19,593                      | 15,000               |
| AR <sub>10</sub> ≥5.0%                                | 22,974,469                             | 803,055      | 19,331,053       | 17,268,427,077              | 22,033                      | 27,000               |

<sup>a</sup>Incremental to prior most effective, non-dominated strategy



**eFigure 1. CVD Policy Model Microsimulation Version Structure, Within-Cycle Events**

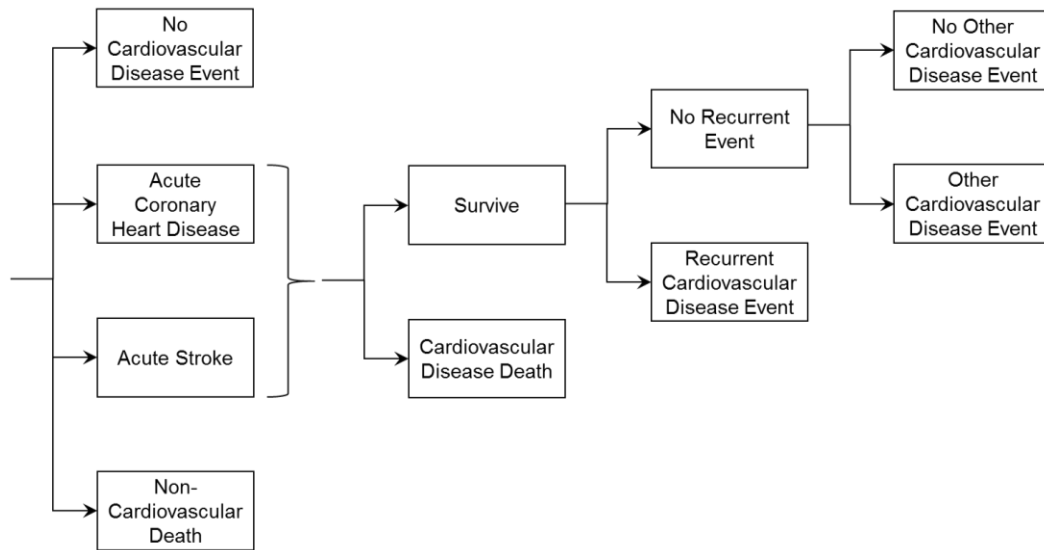

## eFigure 2. Validation of the CVD Policy Model Microsimulation Version

### A) Women

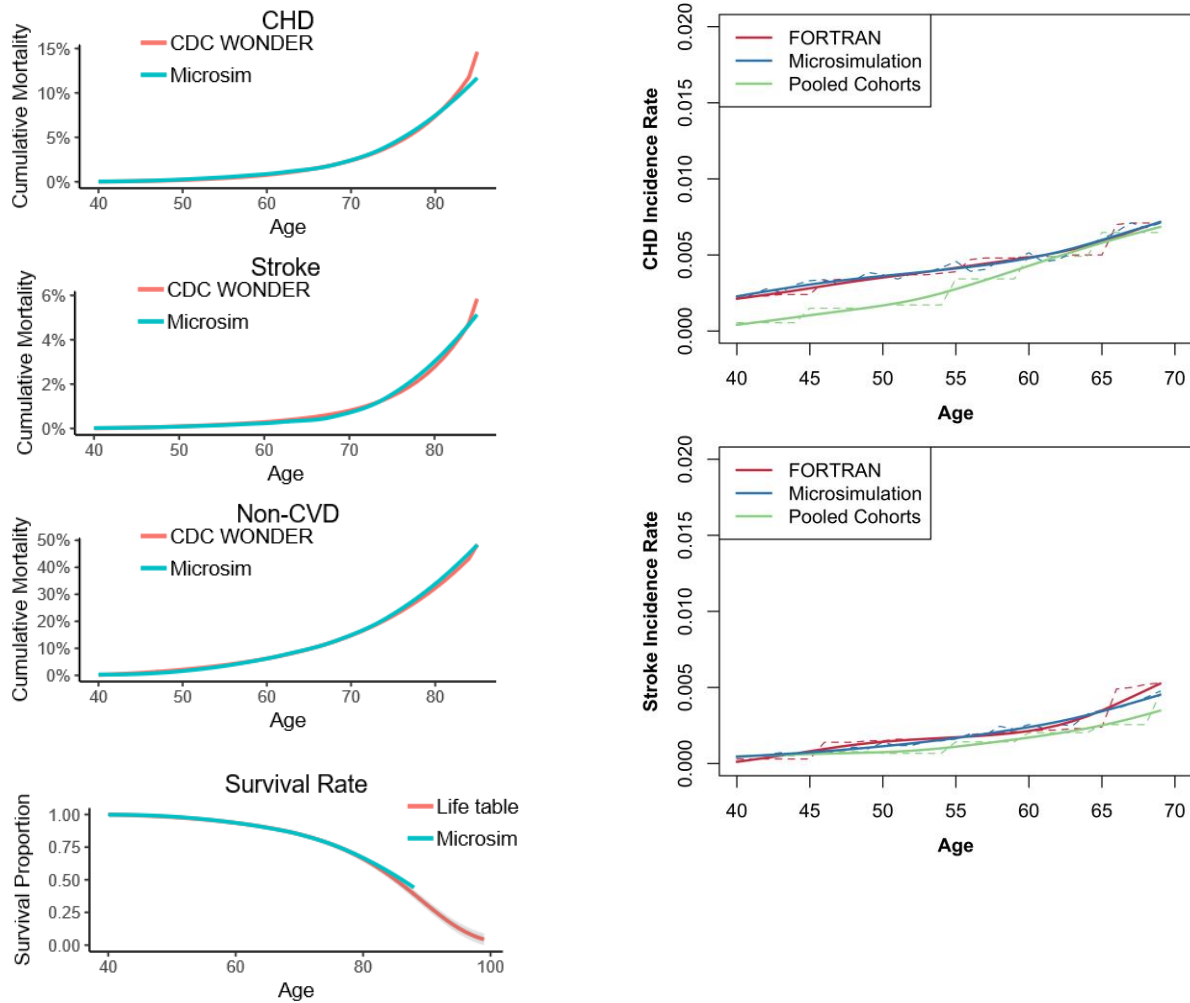

CDC WONDER – Centers for Disease Control and Prevention’s Wide-ranging ONline Data for Epidemiologic Research, CHD – coronary heart disease, CVD – cardiovascular disease.

Notes: The figures compare the outputs of the CVD Policy Model microsimulation version to: (1) estimated incidence rate of CHD and stroke from the traditional CVD Policy Model, base year: 2010 (upper two left panels), (2) cumulative CHD and stroke mortality from CDC WONDER data (upper two right panels), 1999-2016 (3) survival rate in US life tables (lower left panel), base year: 2014 and (4) incidence rate of non-CVD mortality from CDC Wonder data, 1999-2014.

## B) Men

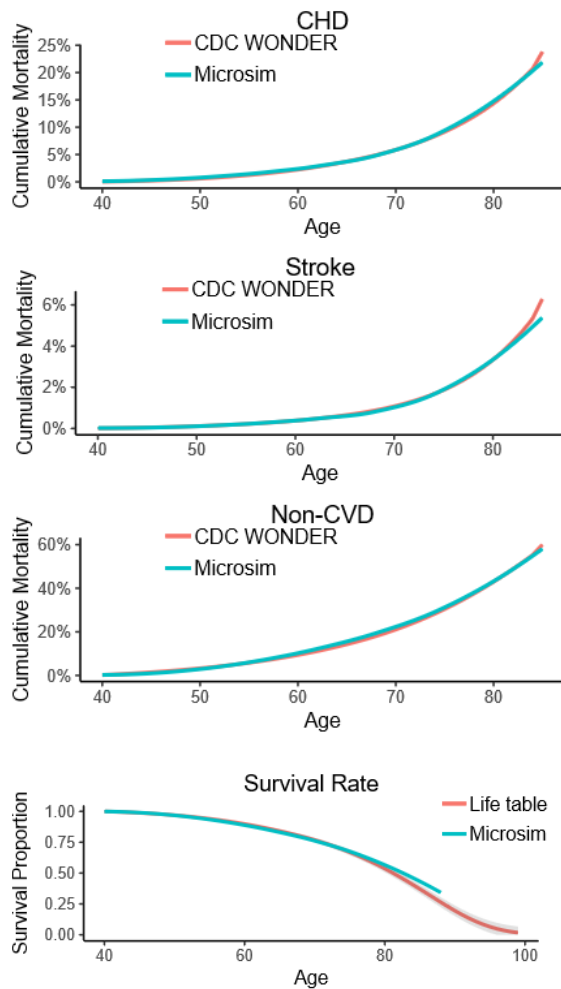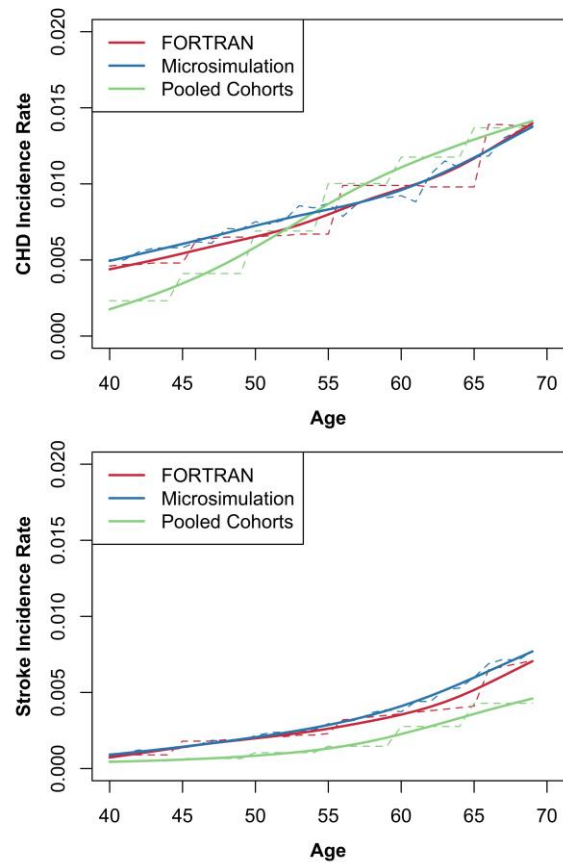

CDC WONDER – Centers for Disease Control and Prevention’s Wide-ranging ONline Data for Epidemiologic Research, CHD – coronary heart disease, CVD – cardiovascular disease.

Notes: The figures compare the outputs of the CVD Policy Model microsimulation version to: (1) estimated incidence rate of CHD and stroke from the traditional CVD Policy Model (upper two left panels), (2) cumulative CHD and stroke mortality from CDC WONDER data (upper two right panels), (3) survival rate in US life tables (lower left panel), and (4) incidence rate of non-CVD mortality from CDC Wonder data.

**eFigure 3. Untreated LDL Cholesterol Lifetime Trajectory**

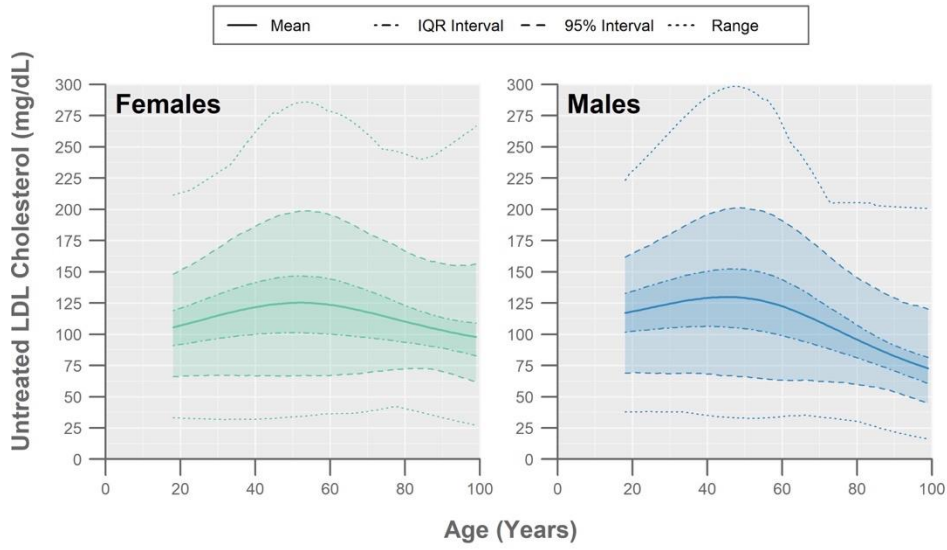

IQR – Interquartile Range; LDL – low-density lipoprotein; 95% Interval – 2.5<sup>th</sup> to 97.5<sup>th</sup> percentile.

## eFigure 4. Cost-Effectiveness Plane for Base Case Analysis

### A) Women

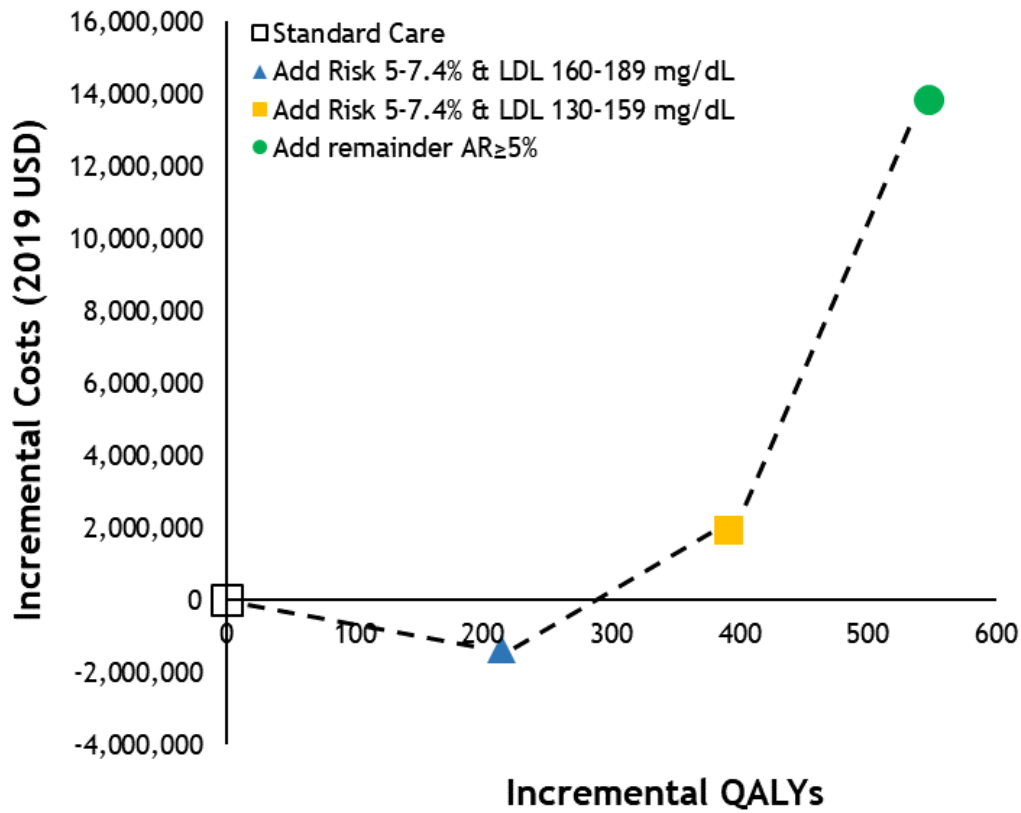

AR<sub>10</sub> – 10-year atherosclerotic cardiovascular disease risk, LDL-C low-density lipoprotein cholesterol, QALYs – quality-adjusted life years.

Figure shows the incremental costs and quality-adjusted life years of each strategy compared to standard care. Strategies that are in the fourth quadrant are cost-saving relative to standard care; strategies in the first quadrant cost more and are more effective than standard care. The slope of the line between each strategy indicates the incremental cost-effectiveness ratio.

## B) Men

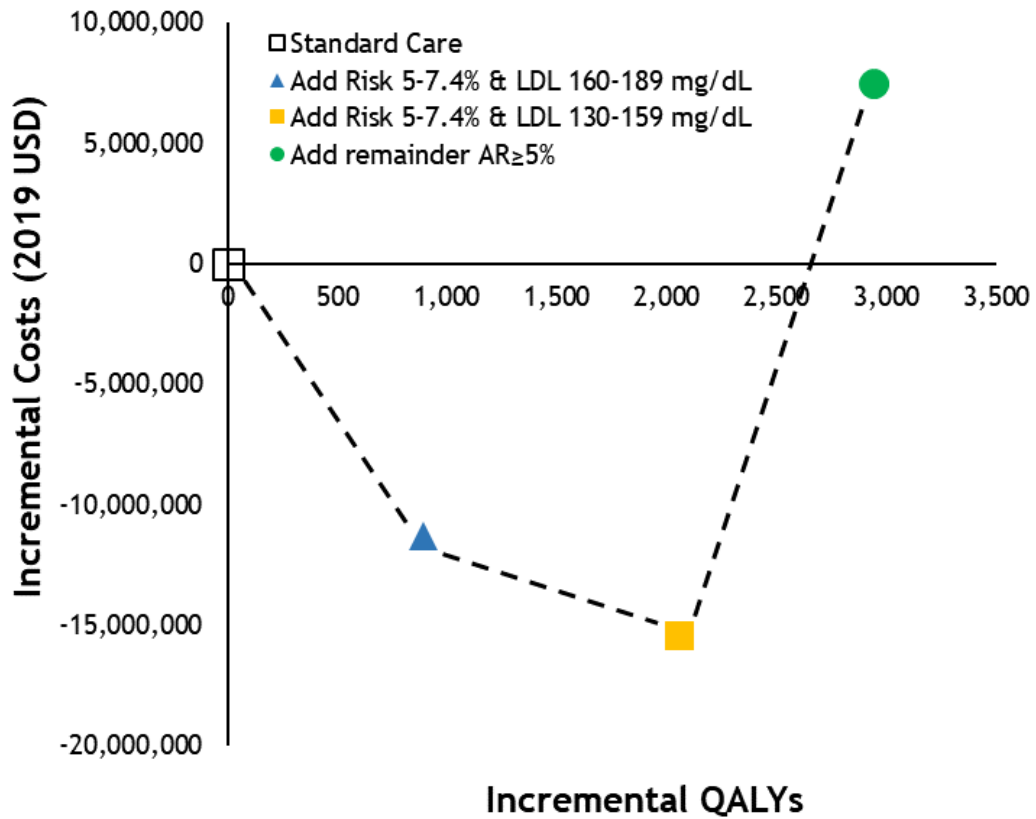

AR<sub>10</sub> – 10-year atherosclerotic cardiovascular disease risk, LDL-C low-density lipoprotein cholesterol, QALYs – quality-adjusted life years.

Figure shows the incremental costs and quality-adjusted life years of each strategy compared to standard care. Strategies that are in the fourth quadrant are cost-saving relative to standard care; strategies in the first quadrant cost more and are more effective than standard care. The slope of the line between each strategy indicates the incremental cost-effectiveness ratio.

### C) Combined women and men

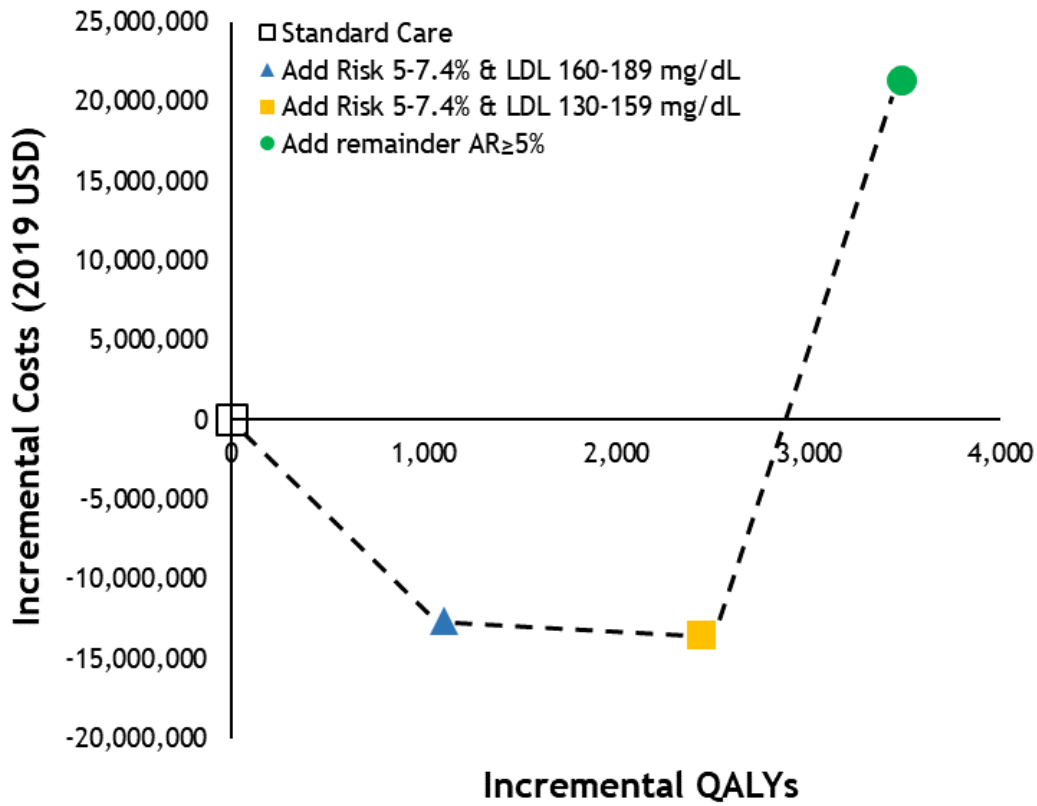

AR<sub>10</sub> – 10-year atherosclerotic cardiovascular disease risk, LDL-C low-density lipoprotein cholesterol, QALYs – quality-adjusted life years.

Figure shows the incremental costs and quality-adjusted life years of each strategy compared to standard care. Strategies that are in the fourth quadrant are cost-saving relative to standard care; strategies in the first quadrant cost more and are more effective than standard care. The slope of the line between each strategy indicates the incremental cost-effectiveness ratio.

### eFigure 5. One-Way Sensitivity Analysis Tornado Diagram

**A) Women: Standard care (SC; treat AR<sub>10</sub> ≥7.5%, LDL-C ≥190 mg/dL, and diabetes) vs. SC + treat borderline risk (AR<sub>10</sub> 5.0-7.4%) with LDL-C 160-189 mg/dL.**

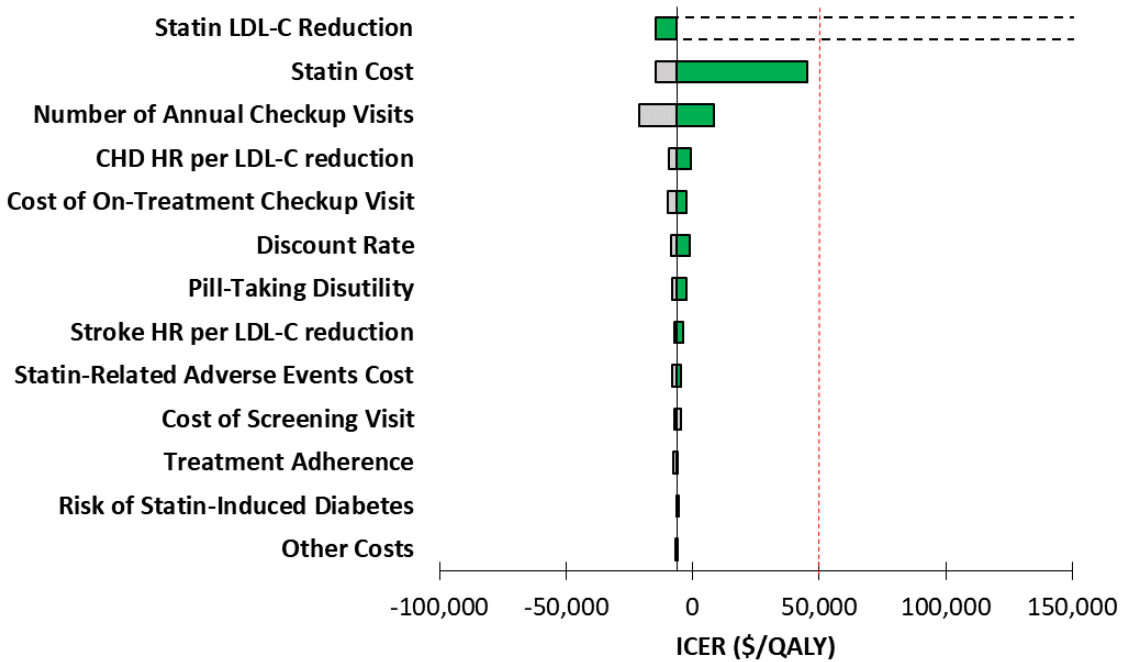

AR<sub>10</sub> – 10-year atherosclerotic cardiovascular disease risk, CHD – coronary heart disease, HR – hazard ratio, ICER – incremental cost-effectiveness ratio, LDL-C low-density lipoprotein cholesterol, QALY – quality-adjusted life years, SC – standard care.

Notes: The tornado diagrams show the impact that independently changing the model parameters has on the incremental cost-effectiveness ratio (ICER) between two strategies. Upper and lower values employed in analysis presented in main text Table 1. Green bars represent ICER for upper parameter input value, white bars represent ICER for lower parameter input value. Dotted red line shows willingness-to-pay of \$50,000 per QALY gained. Treatment decision was strictly dominated (more costs, less QALYs) when applying the lower estimate for LDL-C reduction from statin therapy.



**B) Men: SC vs. SC + treat borderline risk (AR<sub>10</sub> 5.0-7.4%) with LDL-C 160-189 mg/dL.**

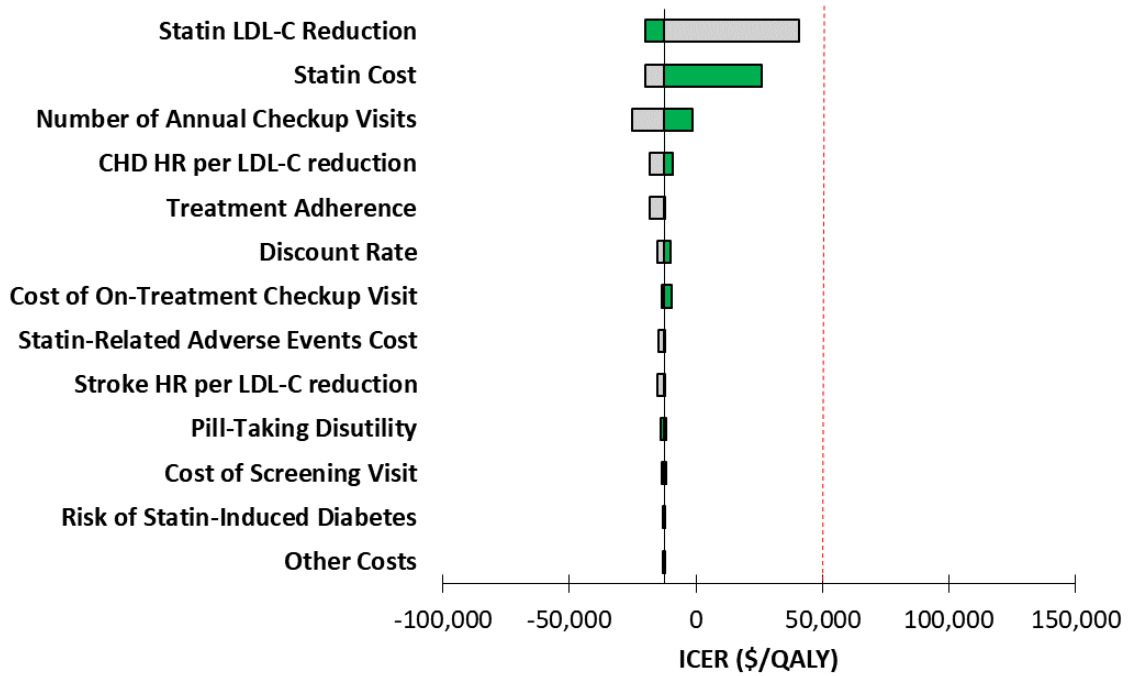

AR<sub>10</sub> – 10-year atherosclerotic cardiovascular disease risk, CHD – coronary heart disease, HR – hazard ratio, ICER – incremental cost-effectiveness ratio, LDL-C low-density lipoprotein cholesterol, QALY – quality-adjusted life years, SC – standard care.

Notes: The tornado diagrams show the impact that independently changing the model parameters has on the incremental cost-effectiveness ratio (ICER) between two strategies. Upper and lower values employed in analysis presented in main text Table 1. Green bars represent ICER for upper parameter input value, white bars represent ICER for lower parameter input value. Dotted red line shows willingness-to-pay of \$50,000 per QALY gained.

**C) Women: SC + treat borderline risk with LDL-C 160-189 mg/dL vs. SC + treat borderline risk with LDL-C 130-159 mg/dL.**

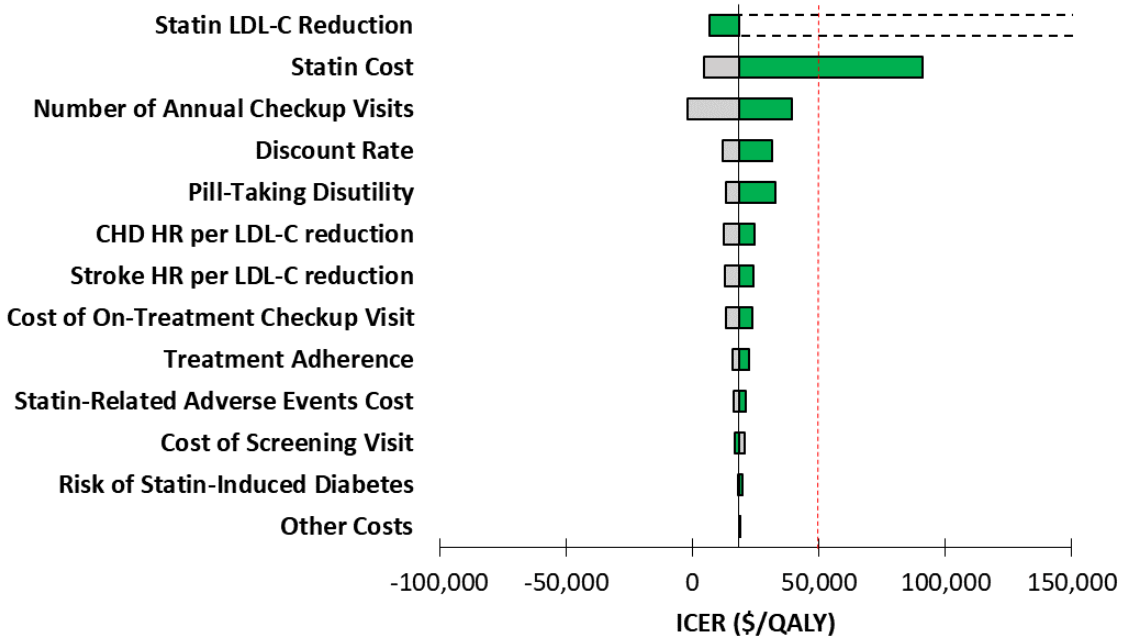

AR<sub>10</sub> – 10-year atherosclerotic cardiovascular disease risk, CHD – coronary heart disease, HR – hazard ratio, ICER – incremental cost-effectiveness ratio, LDL-C low-density lipoprotein cholesterol, QALY – quality-adjusted life years, SC – standard care.

Notes: The tornado diagrams show the impact that independently changing the model parameters has on the incremental cost-effectiveness ratio (ICER) between two strategies. Upper and lower values employed in analysis presented in main text Table 1. Green bars represent ICER for upper parameter input value, white bars represent ICER for lower parameter input value. Dotted red line shows willingness-to-pay of \$50,000 per QALY gained. Treatment decision was strictly dominated (more costs, less QALYs) when applying the lower estimate for LDL-C reduction from statin therapy.

**D) Men: SC + treat borderline risk with LDL-C 160-189 mg/dL vs. SC + treat borderline risk with LDL-C 130-159 mg/dL.**

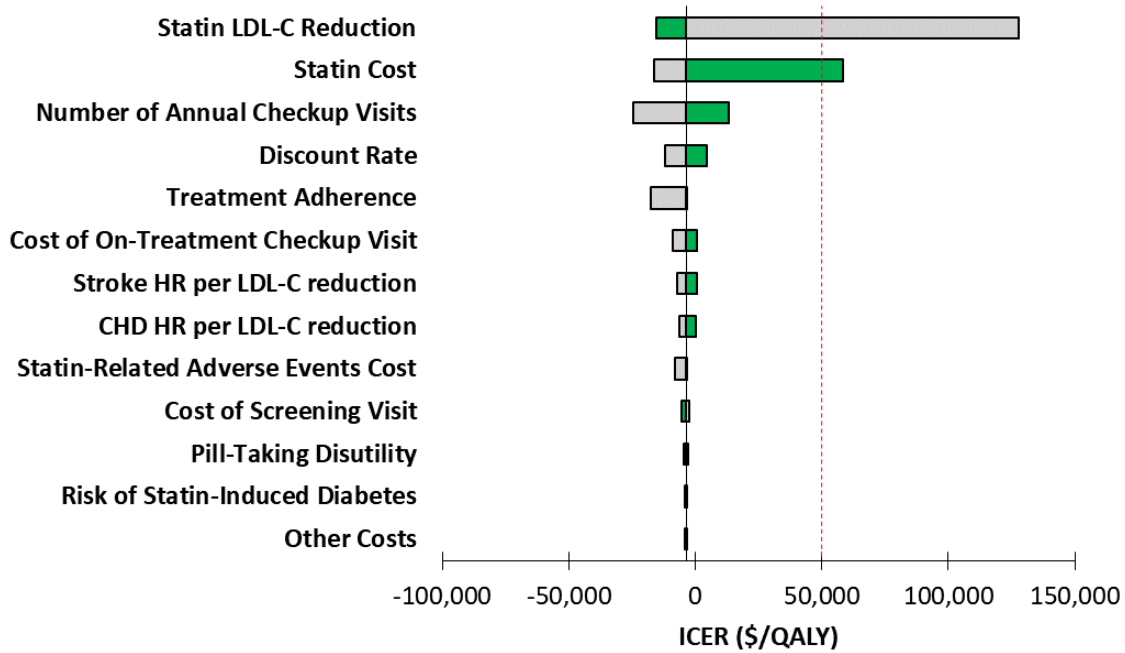

AR<sub>10</sub> – 10-year atherosclerotic cardiovascular disease risk, CHD – coronary heart disease, HR – hazard ratio, ICER – incremental cost-effectiveness ratio, LDL-C low-density lipoprotein cholesterol, QALY – quality-adjusted life years, SC – standard care.

Notes: The tornado diagrams show the impact that independently changing the model parameters has on the incremental cost-effectiveness ratio (ICER) between two strategies. Upper and lower values employed in analysis presented in main text Table 1. Green bars represent ICER for upper parameter input value, white bars represent ICER for lower parameter input value. Dotted red line shows willingness-to-pay of \$50,000 per QALY gained.

**E) Women: SC + treat borderline risk with LDL-C 160-189 mg/dL vs. SC + treat all borderline risk.**

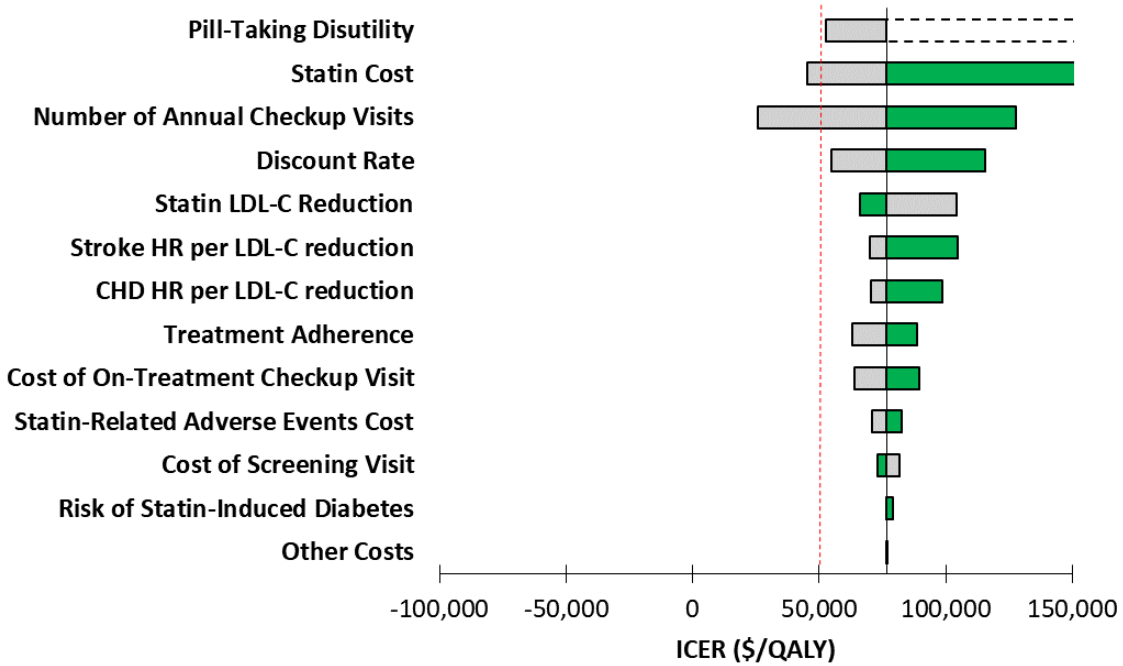

AR<sub>10</sub> – 10-year atherosclerotic cardiovascular disease risk, CHD – coronary heart disease, HR – hazard ratio, ICER – incremental cost-effectiveness ratio, LDL-C low-density lipoprotein cholesterol, QALY – quality-adjusted life years, SC – standard care.

Notes: The tornado diagrams show the impact that independently changing the model parameters has on the incremental cost-effectiveness ratio (ICER) between two strategies. Upper and lower values employed in analysis presented in main text Table 1. Green bars represent ICER for upper parameter input value, white bars represent ICER for lower parameter input value. Dotted red line shows willingness-to-pay of \$50,000 per QALY gained. Treatment decision was strictly dominated (more costs, less QALYs) when applying the upper estimate for pill-taking disutility. ICER associated with upper estimate of statin cost was \$673,700 per QALY gained.

**F) Men: SC + treat borderline risk with LDL-C 160-189 mg/dL vs. SC + treat all borderline risk.**

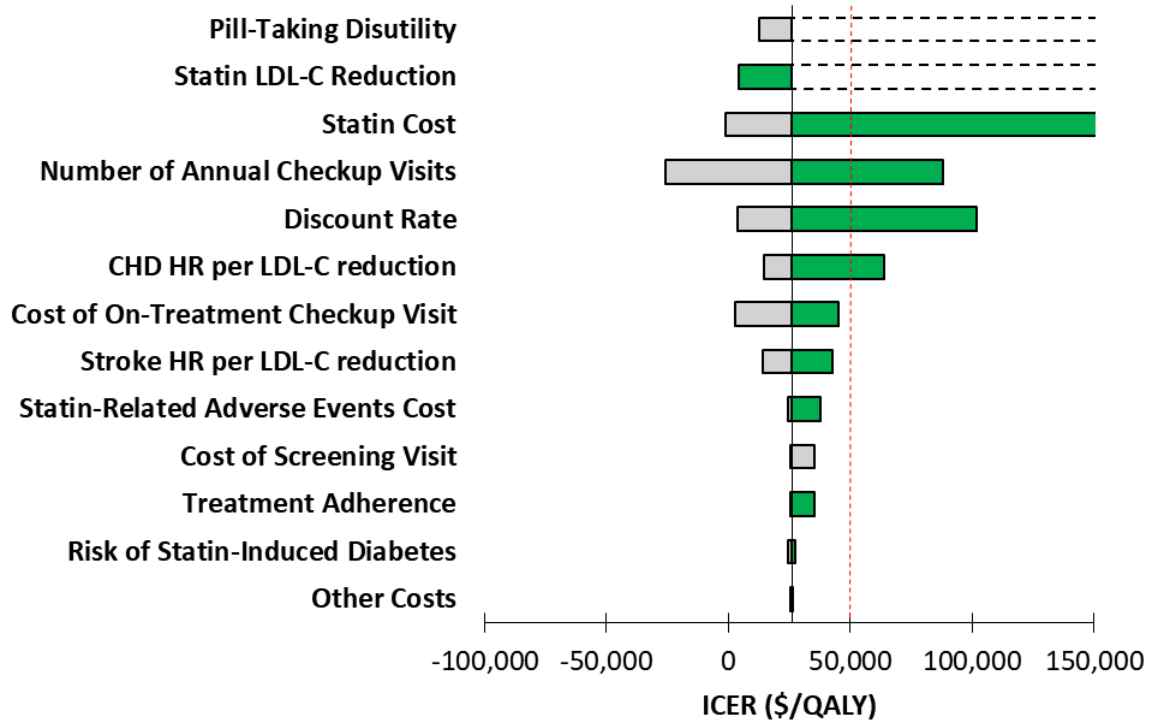

AR<sub>10</sub> – 10-year atherosclerotic cardiovascular disease risk, CHD – coronary heart disease, HR – hazard ratio, ICER – incremental cost-effectiveness ratio, LDL-C low-density lipoprotein cholesterol, QALY – quality-adjusted life years, SC – standard care.

Notes: The tornado diagrams show the impact that independently changing the model parameters has on the incremental cost-effectiveness ratio (ICER) between two strategies. Upper and lower values employed in analysis presented in main text Table 1. Green bars represent ICER for upper parameter input value, white bars represent ICER for lower parameter input value. Dotted red line shows willingness-to-pay of \$50,000 per QALY gained. Treatment decision was strictly dominated (more costs, less QALYs) when applying the upper estimate for pill-taking disutility and lower estimate for LDL-C reduction from statin therapy. ICER associated with upper estimate of statin cost was \$373,600 per QALY gained.

**eFigure 6. One-Way Sensitivity Analysis of Statin-Related Adverse Event Disutility on Discounted QALY Gains for Standard Care vs Standard Care Plus Treat LDL 160-189 mg/dL**

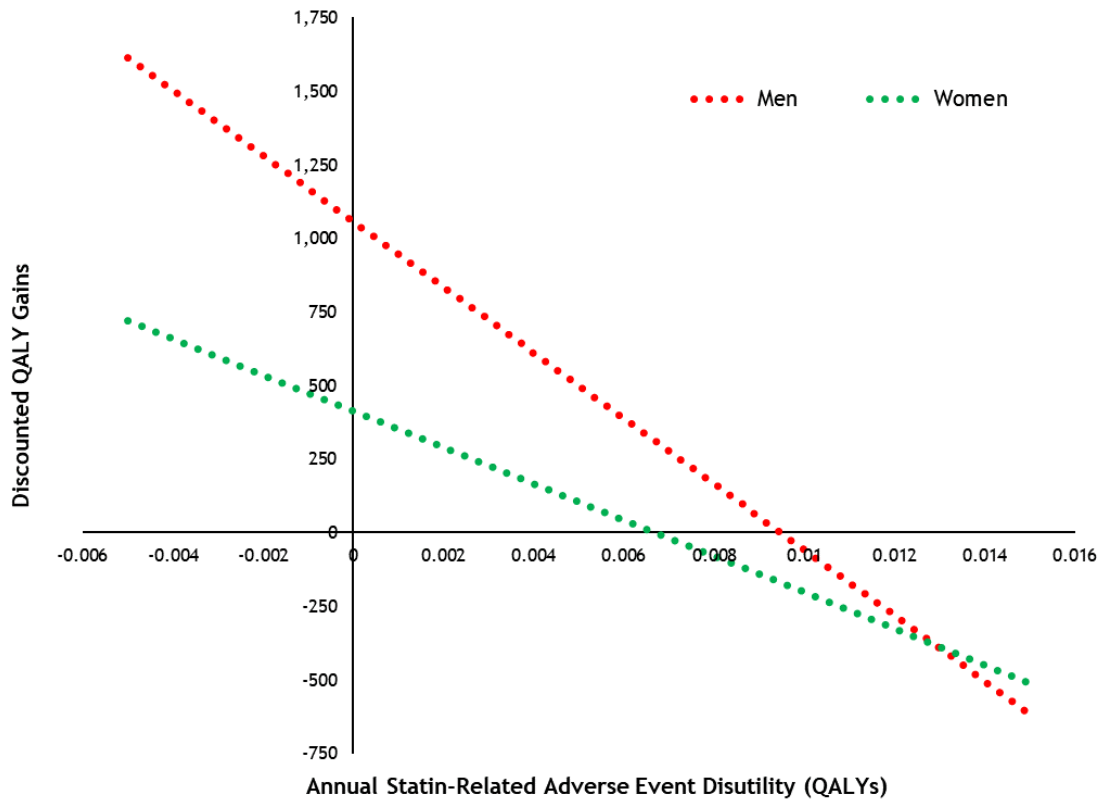

LDL-C – low-density lipoprotein cholesterol, QALY – quality-adjusted life years.

The figure shows the impact changing the annual statin-related adverse event disutility has on the lifetime discounted quality-adjusted life years gained in cohort of 500,000 women and 500,000 men, respectively, when comparing initiation of statins under standard care to standard care plus  $AR_{10} \geq 5\%$  and an LDL-C 160-189 mg/dL.

## eFigure 7. Cost-Effectiveness Acceptability Curve

### A) Women

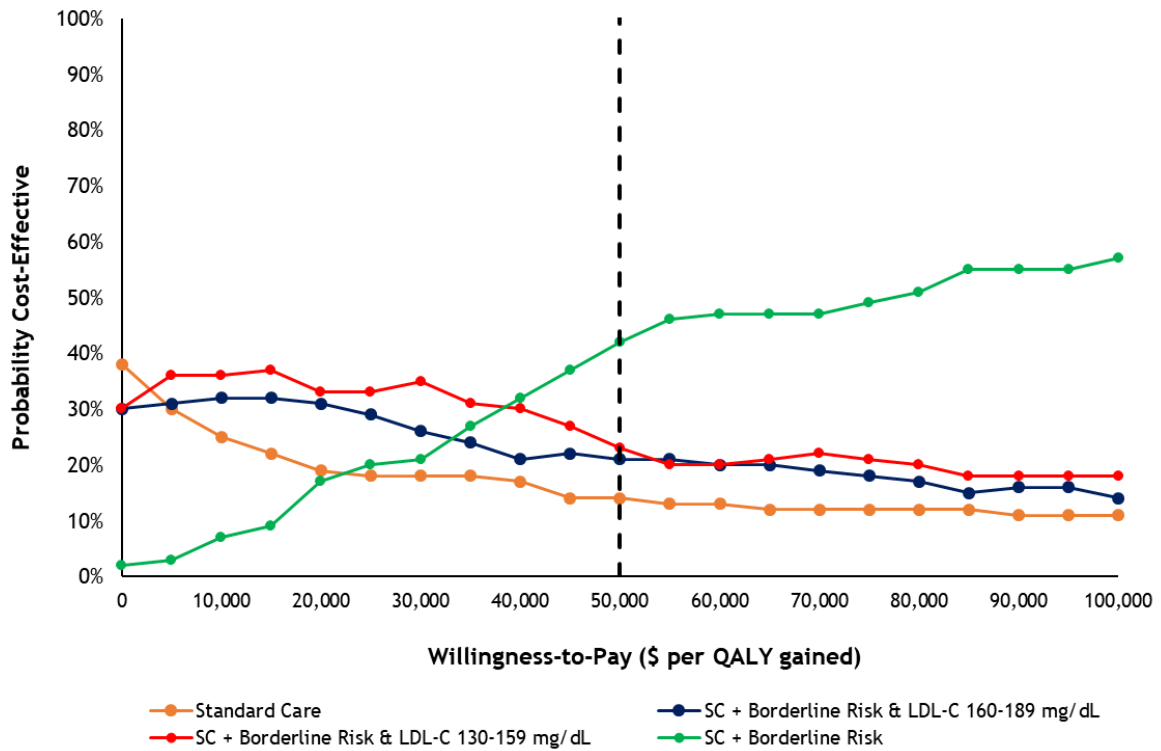

AR<sub>10</sub> – 10-year atherosclerotic cardiovascular disease risk, Borderline risk - AR<sub>10</sub> 5.0-7.4%, LDL – low-density lipoprotein cholesterol, QALY – quality-adjusted life year, SC – standard care.

The figures show the probability that each strategy is cost-effective as the willingness to pay for a quality-adjusted life year (QALY) changes. The dashed black line indicates the commonly accepted willingness-to-pay threshold of \$50,000/QALY.

## B) Men

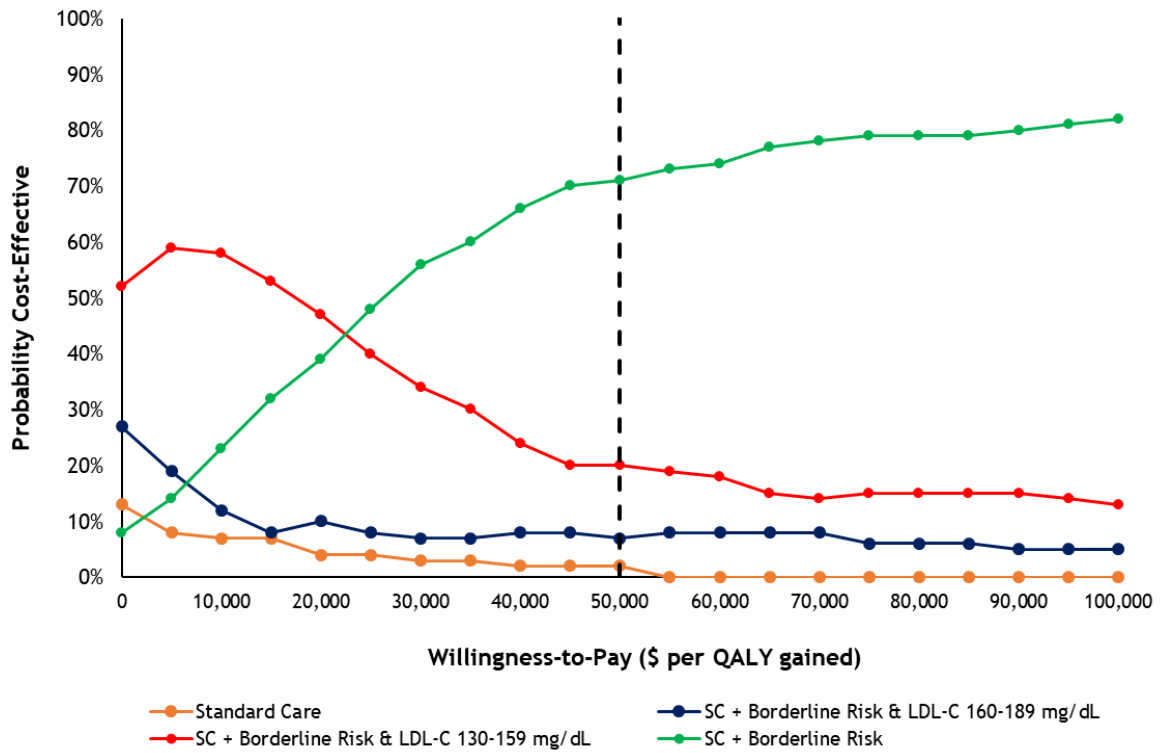

AR<sub>10</sub> – 10-year atherosclerotic cardiovascular disease risk, Borderline risk - AR<sub>10</sub> 5.0-7.4%, LDL – low-density lipoprotein cholesterol, QALY – quality-adjusted life year, SC – standard care.

The figures show the probability that each strategy is cost-effective as the willingness to pay for a quality-adjusted life year (QALY) changes. The dashed black line indicates the commonly accepted willingness-to-pay threshold of \$50,000/QALY.



**eFigure 8. Incremental Cost-Effectiveness Scatter Plot**  
**A) Women**

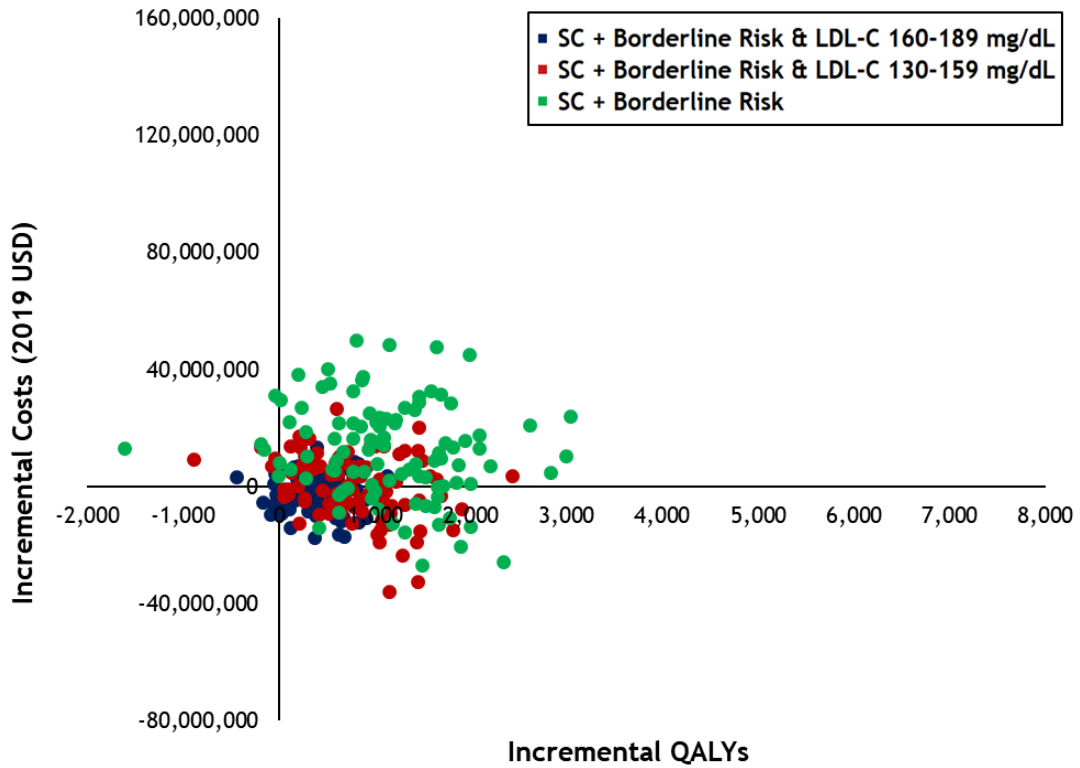

LDL – low-density lipoprotein cholesterol, QALYs – quality-adjusted life years, SC – standard care.

Notes: The figures show the results of the 500 probabilistic iterations of the model. Each dot indicates the incremental costs and incremental effectiveness of the strategy relative to standard care in one iteration of the model.

## B) Men

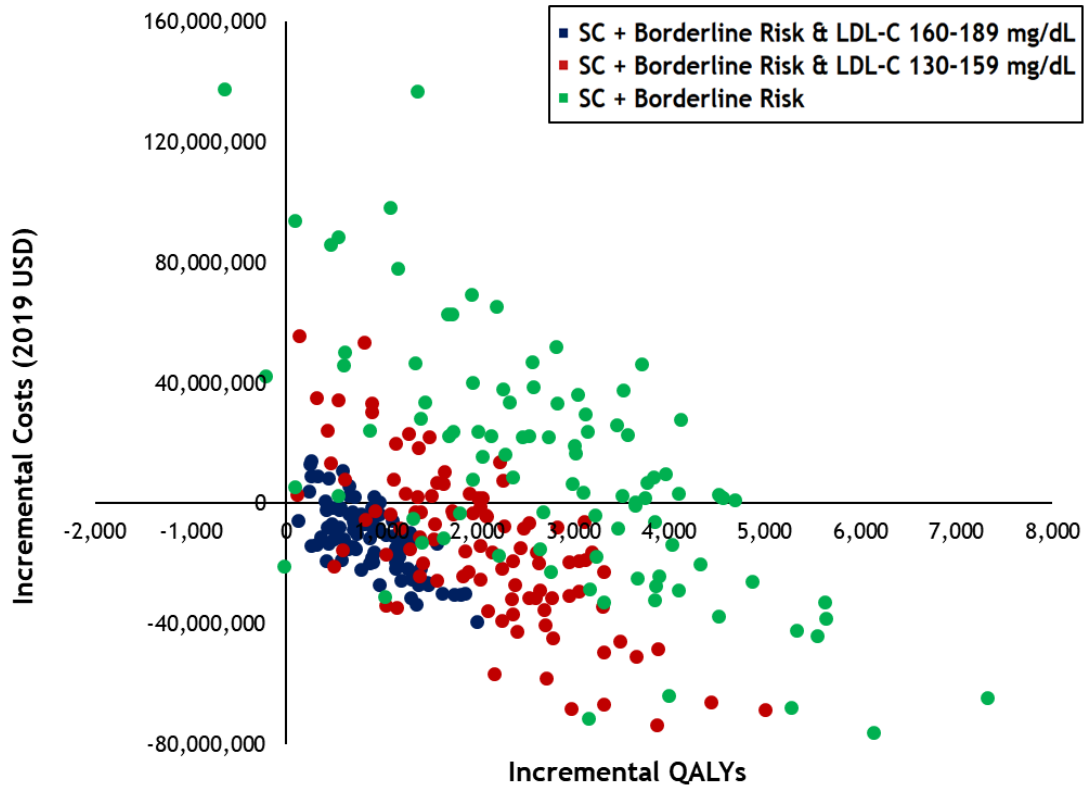

LDL – low-density lipoprotein cholesterol, QALYs – quality-adjusted life years, SC – standard care.

Notes: The figures show the results of the 500 probabilistic iterations of the model. Each dot indicates the incremental costs and incremental effectiveness of the strategy relative to standard care in one iteration of the model.

## eReferences.

1. Weinstein MC, Coxson PG, Williams LW, Pass TM, Stason WB, Goldman L. Forecasting coronary heart disease incidence, mortality, and cost: the Coronary Heart Disease Policy Model. *Am J Public Health*. 1987;77(11):1417-1426.
2. Oelsner EC, Balte PP, Cassano P, et al. Harmonization of Respiratory Data From Nine US Population-Based Cohorts: The NHLBI Pooled Cohorts Study. *Am J Epidemiol*. June 2018. doi:10.1093/aje/kwy139
3. The Atherosclerosis Risk in Communities (ARIC) Study: Design and Objectives. *American Journal of Epidemiology*. 1989;129(4):687-702. doi:10.1093/oxfordjournals.aje.a115184
4. Hughes GH, Cutter G, Donahue R, et al. Recruitment in the Coronary Artery Disease Risk Development in Young Adults (Cardia) study. *Controlled Clinical Trials*. 1987;8(4, Supplement 1):68-73. doi:10.1016/0197-2456(87)90008-0
5. Fried LP, Borhani NO, Enright P, et al. The Cardiovascular Health Study: design and rationale. *Ann Epidemiol*. 1991;1(3):263-276.
6. *Framingham Offspring Study*. Framingham, MA: National Heart, Lung, & Blood Institute & Boston University; 2016. <https://www.framinghamheartstudy.org/about-the-fhs-participants/offspring-cohort/>.
7. Visser M, Fuerst T, Lang T, Salamone L, Harris TB. Validity of fan-beam dual-energy X-ray absorptiometry for measuring fat-free mass and leg muscle mass. Health, Aging, and Body Composition Study--Dual-Energy X-ray Absorptiometry and Body Composition Working Group. *J Appl Physiol*. 1999;87(4):1513-1520. doi:10.1152/jappl.1999.87.4.1513
8. Bild DE, Bluemke DA, Burke GL, et al. Multi-Ethnic Study of Atherosclerosis: Objectives and Design. *Am J Epidemiol*. 2002;156(9):871-881. doi:10.1093/aje/kwf113
9. Green MS, Symons MJ. A comparison of the logistic risk function and the proportional hazards model in prospective epidemiologic studies. *J Chronic Dis*. 1983;36(10):715-723.
10. *National Health and Nutrition Examination Survey Data*. Centers for Disease Control and Prevention. National Center for Health Statistics. Hyattsville, MD: U.S. Department of Health and Human Services. Centers for Disease Control and Prevention; 1999. <https://wwwn.cdc.gov/Nchs/Nhanes/1999-2000/DSPI.htm>.
11. Pletcher MJ, Vittinghoff E, Thanataveerat A, Bibbins-Domingo K, Moran AE. Young Adult Exposure to Cardiovascular Risk Factors and Risk of Events Later in Life: The Framingham Offspring Study. *PLOS ONE*. 2016;11(5):e0154288. doi:10.1371/journal.pone.0154288
12. Zeki Al Hazzouri A, Vittinghoff E, Zhang Y, et al. Use of a pooled cohort to impute cardiovascular disease risk factors across the adult life course. *Int J Epidemiol*. December 2018. doi:10.1093/ije/dyy264
13. Moran AE, Forouzanfar MH, Roth GA, et al. Temporal trends in ischemic heart disease mortality in 21 world regions, 1980 to 2010: the Global Burden of Disease 2010 study. *Circulation*. 2014;129(14):1483-1492. doi:10.1161/CIRCULATIONAHA.113.004042
14. Moran AE, Forouzanfar MH, Roth GA, et al. The global burden of ischemic heart disease in 1990 and 2010: the Global Burden of Disease 2010 study. *Circulation*. 2014;129(14):1493-1501. doi:10.1161/CIRCULATIONAHA.113.004046

15. Murray CJL, Vos T, Lozano R, et al. Disability-adjusted life years (DALYs) for 291 diseases and injuries in 21 regions, 1990–2010: a systematic analysis for the Global Burden of Disease Study 2010. *The Lancet*. 2012;380(9859):2197-2223. doi:10.1016/S0140-6736(12)61689-4
16. *California Public Patient Discharge Data*. Sacramento, CA: California Office of Statewide Health Planning and Development.; 2008. [https://data.bls.gov/timeseries/CUUR0000SAM?output\\_view=pct\\_12mths](https://data.bls.gov/timeseries/CUUR0000SAM?output_view=pct_12mths).
17. *Hospital Financial Data*. Sacramento, CA: California Office of Statewide Health Planning and Development.; 2008. [https://data.bls.gov/timeseries/CUUR0000SAM?output\\_view=pct\\_12mths](https://data.bls.gov/timeseries/CUUR0000SAM?output_view=pct_12mths).
18. Medical Expenditure Panel Survey public use files 1998-2008. 2008. <http://meps.ahrq.gov/mepsweb/>.
19. Bureau of Labor Statistics Data. Consumer Price Index for all urban consumers. [data.bls.gov](https://data.bls.gov/timeseries/CUUR0000SAM?output_view=pct_12mths). [https://data.bls.gov/timeseries/CUUR0000SAM?output\\_view=pct\\_12mths](https://data.bls.gov/timeseries/CUUR0000SAM?output_view=pct_12mths). Published January 2019. Accessed October 24, 2018.
20. Medical Expenditure Panel Survey 2015. <http://meps.ahrq.gov/mepsweb/>. Published 2015.
21. O’Sullivan AK, Rubin J, Nyambose J, Kuznik A, Cohen DJ, Thompson D. Cost Estimation of Cardiovascular Disease Events in the US. *Pharmacoeconomics*. 2011;29(8):693-704. doi:10.2165/11584620-000000000-00000
22. Pandya A, Sy S, Cho S, Weinstein MC, Gaziano TA. Cost-effectiveness of 10-Year Risk Thresholds for Initiation of Statin Therapy for Primary Prevention of Cardiovascular Disease. *JAMA*. 2015;314(2):142-150. doi:10.1001/jama.2015.6822
23. Centers for Disease Control and Prevention. CDC WONDER. [wonder.cdc.gov](https://wonder.cdc.gov/). <https://wonder.cdc.gov/>. Published January 2019. Accessed February 21, 2019.
24. Goldberg RJ, McCormick D, Gurwitz JH, Yarzebski J, Lessard D, Gore JM. Age-related trends in short- and long-term survival after acute myocardial infarction: a 20-year population-based perspective (1975-1995). *Am J Cardiol*. 1998;82(11):1311-1317.
25. Krumholz HM, Chen J, Chen YT, Wang Y, Radford MJ. Predicting one-year mortality among elderly survivors of hospitalization for an acute myocardial infarction: results from the Cooperative Cardiovascular Project. *J Am Coll Cardiol*. 2001;38(2):453-459.
26. Rogers WJ, Canto JG, Barron HV, Boscarino JA, Shoultz DA, Every NR. Treatment and outcome of myocardial infarction in hospitals with and without invasive capability. Investigators in the National Registry of Myocardial Infarction. *J Am Coll Cardiol*. 2000;35(2):371-379.
27. Vaccarino V, Krumholz HM, Yarzebski J, Gore JM, Goldberg RJ. Sex differences in 2-year mortality after hospital discharge for myocardial infarction. *Ann Intern Med*. 2001;134(3):173-181.
28. Canto JG, Rogers WJ, Chandra NC, et al. The Association of Sex and Payer Status on Management and Subsequent Survival in Acute Myocardial Infarction. *Arch Intern Med*. 2002;162(5):587-593. doi:10.1001/archinte.162.5.587
29. Lampe FC, Whincup PH, Wannamethee SG, Shaper AG, Walker M, Ebrahim S. The natural history of prevalent ischaemic heart disease in middle-aged men. *Eur Heart J*. 2000;21(13):1052-1062. doi:10.1053/euhj.1999.1866
30. Witt BJ, Brown RD, Jacobsen SJ, Weston SA, Yawn BP, Roger VL. A community-based study of stroke incidence after myocardial infarction. *Ann Intern Med*. 2005;143(11):785-792.

31. Lakshminarayan K, Schissel C, Anderson DC, et al. Five-year rehospitalization outcomes in a cohort of patients with acute ischemic stroke: Medicare linkage study. *Stroke*. 2011;42(6):1556-1562. doi:10.1161/STROKEAHA.110.605600
32. Anderson CS, Jamrozik KD, Broadhurst RJ, Stewart-Wynne EG. Predicting survival for 1 year among different subtypes of stroke. Results from the Perth Community Stroke Study. *Stroke*. 1994;25(10):1935-1944.
33. Appelros P, Gunnarsson KE, Terént A. Ten-year risk for myocardial infarction in patients with first-ever stroke: a community-based study. *Acta Neurol Scand*. 2011;124(6):383-389. doi:10.1111/j.1600-0404.2011.01500.x
34. National Hospital Discharge Survey. 2000. <https://www.cdc.gov/nchs/nhds/index.htm>.
35. *Healthcare Quality and Analysis Division, Report on Heart Attack Outcomes in California 1996-1998. Volume 1: User's Guide*. Sacramento, CA: California Office of Statewide Health Planning and Development; 2002.
36. *Healthcare Quality and Analysis Division, Report on Heart Attack Outcomes in California 1996-1998. Volume 2: Technical Guide*. Sacramento, CA: California Office of Statewide Health Planning and Development; 2002.
37. Patient Discharge Data, Version A. 1998 and 2000. 2000.
38. Krumholz HM, Normand S-LT, Wang Y. Trends in hospitalizations and outcomes for acute cardiovascular disease and stroke, 1999-2011. *Circulation*. 2014;130(12):966-975. doi:10.1161/CIRCULATIONAHA.113.007787
39. CDC Wonder: Stroke Mortality Rates. 2005.
